# Supplementary material for: Deep sequencing of small RNA facilitates tissue and sex associated microRNA discovery in zebrafish
Source: PubMed Central journal article supplement (PMC4647824; doi:10.1186/s12864-015-2135-7), 2015-11-16

# Comparison of the expression of dre-miR-21 and dre-let-7 family members:

**dre-miR-21 is highly abundant and ubiquitously expressed**

**dre-let7i appears to be enriched in brain samples as compared to other tissues**

**dre-let-7f, g, h appears to be enriched in all the three replicates of the female liver as compared to the embryo and other tissue samples**

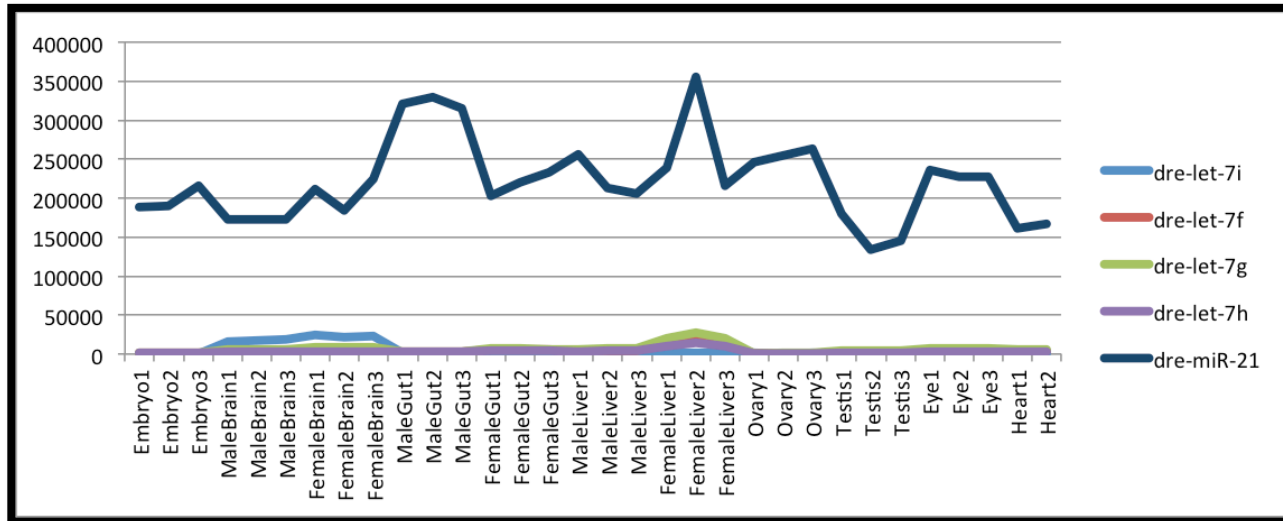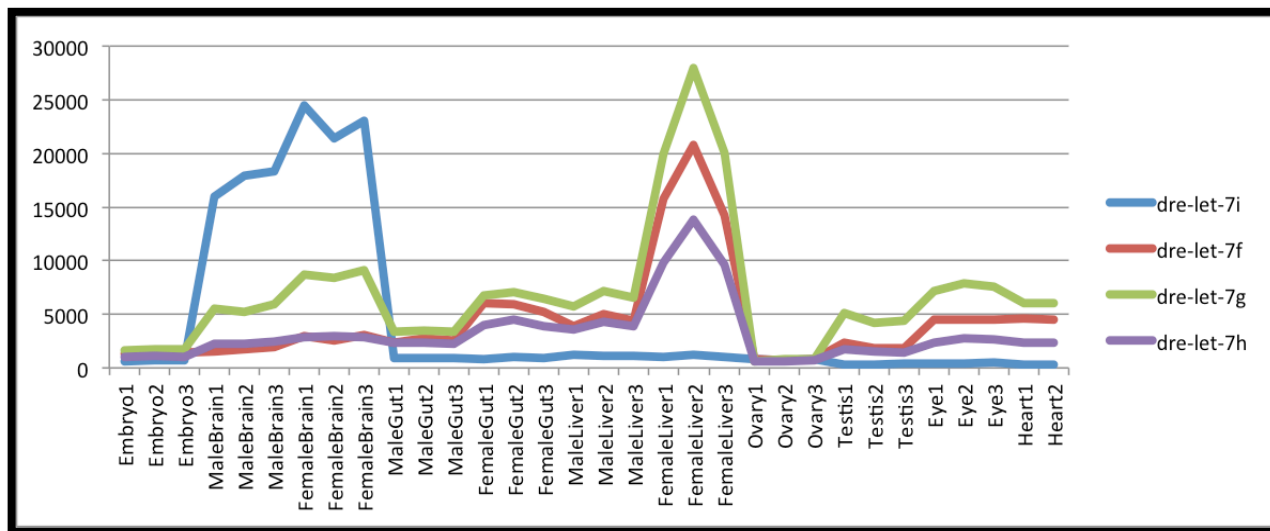

### Embryo associated dre-miR-430a,b,c :

It is high in Embryo that it overshadows the expression of rest of the tissues. It is therefore Embryo specific.  
RNA seq tag density is quite high in embryo compared to ovary

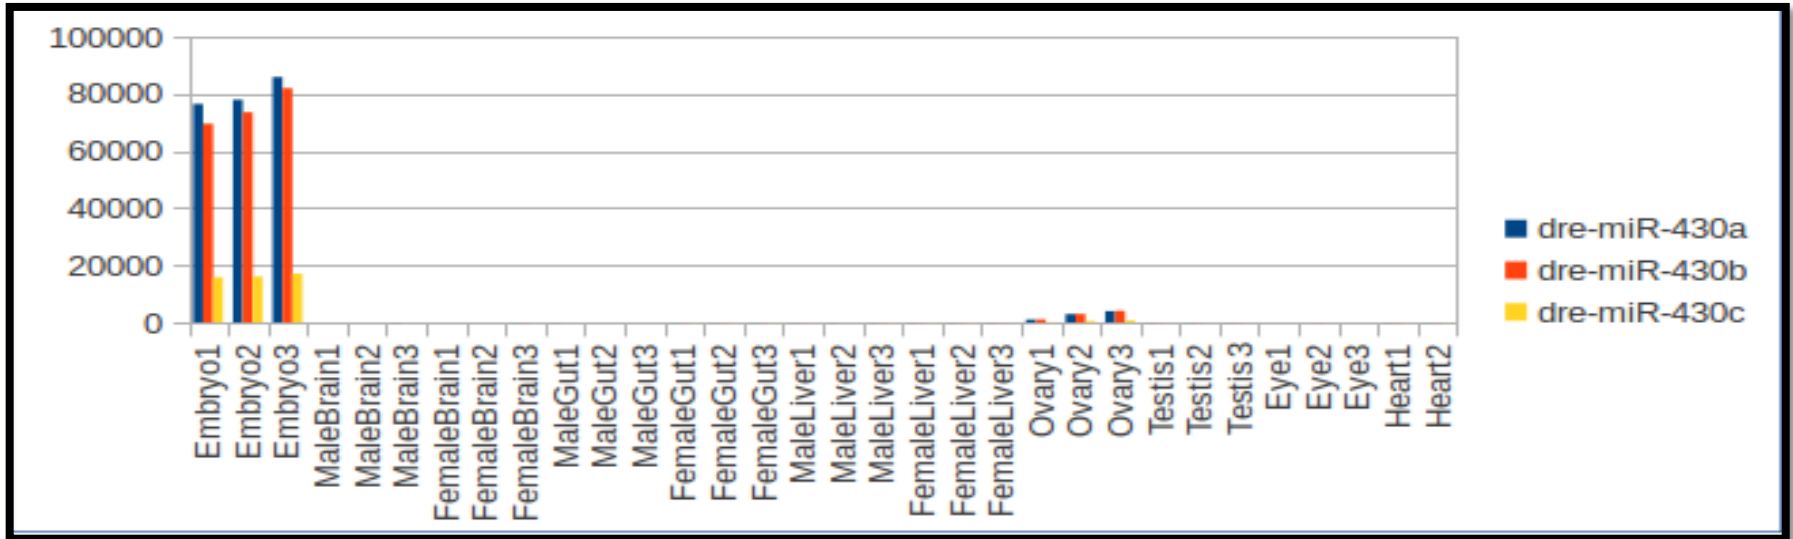

Ovary sex associated dre-miR-430a,b,c vs. Testis :  
Clearly enriched in ovary compared to testis samples

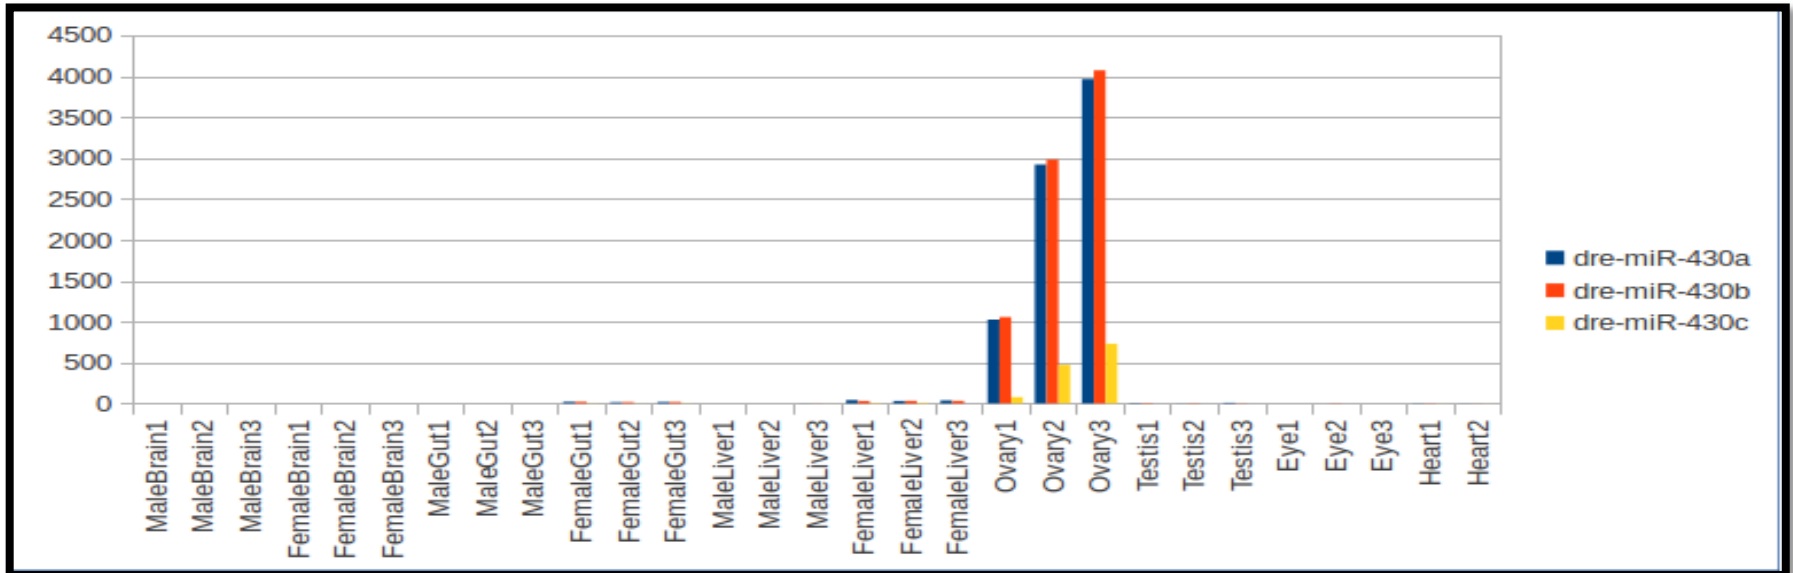

**Female Gut and Female Liver sex associated dre-miR-430a,b,c vs. Male counterparts :  
Clearly enriched in female gut and liver compared to other tissues (ignoring Embryo, and  
Ovary samples; RNA seq tag density is low compared to embryo /ovary)**

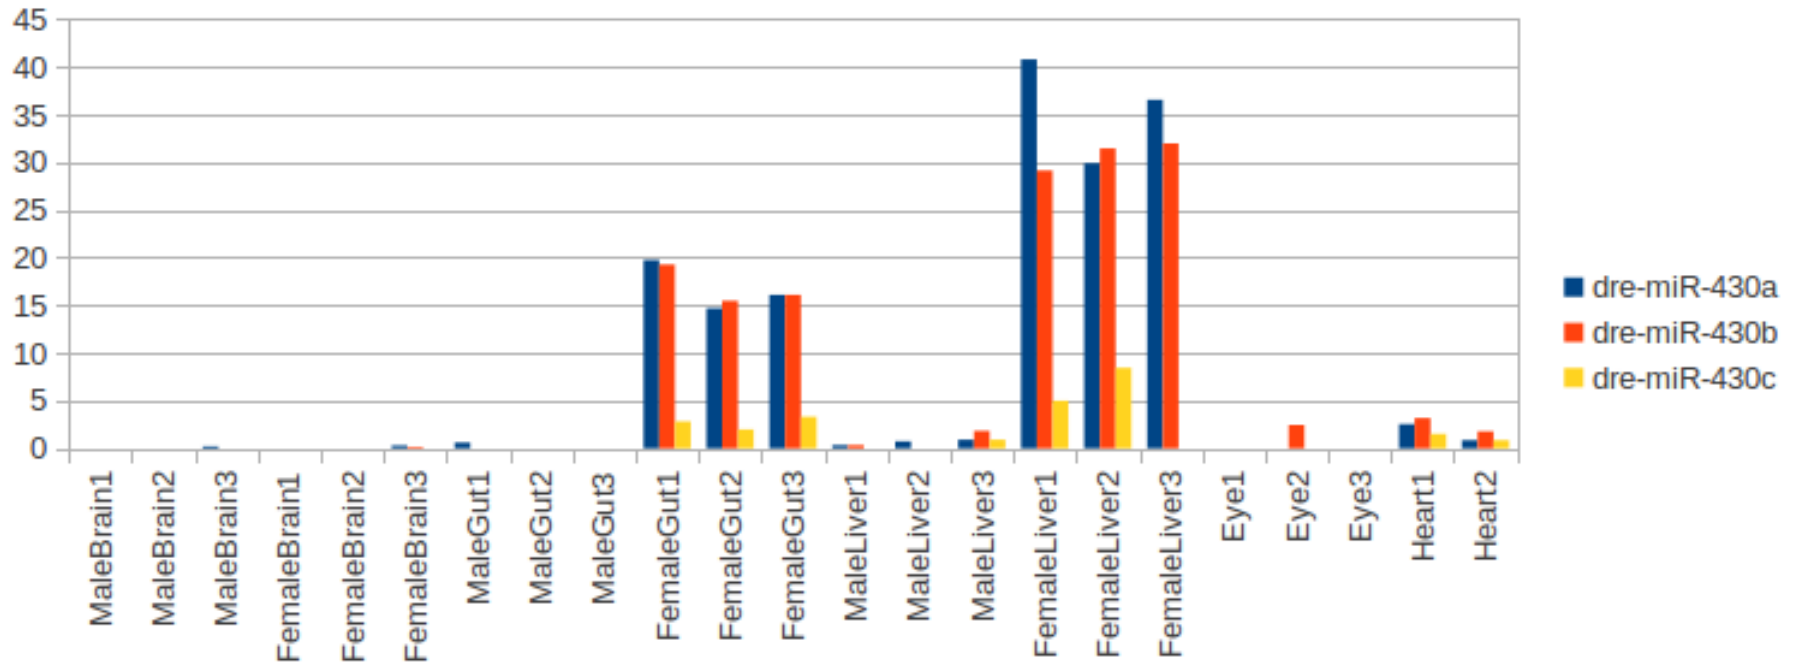

Supplement: 12864_2015_2135_MOESM4_ESM.pdf [file 12864_2015_2135_MOESM4_ESM.pdf]
