# Supplementary material for: Deep sequencing of small RNA facilitates tissue and sex associated microRNA discovery in zebrafish
Source: PubMed Central journal article supplement (PMC4647824; doi:10.1186/s12864-015-2135-7), 2015-11-16

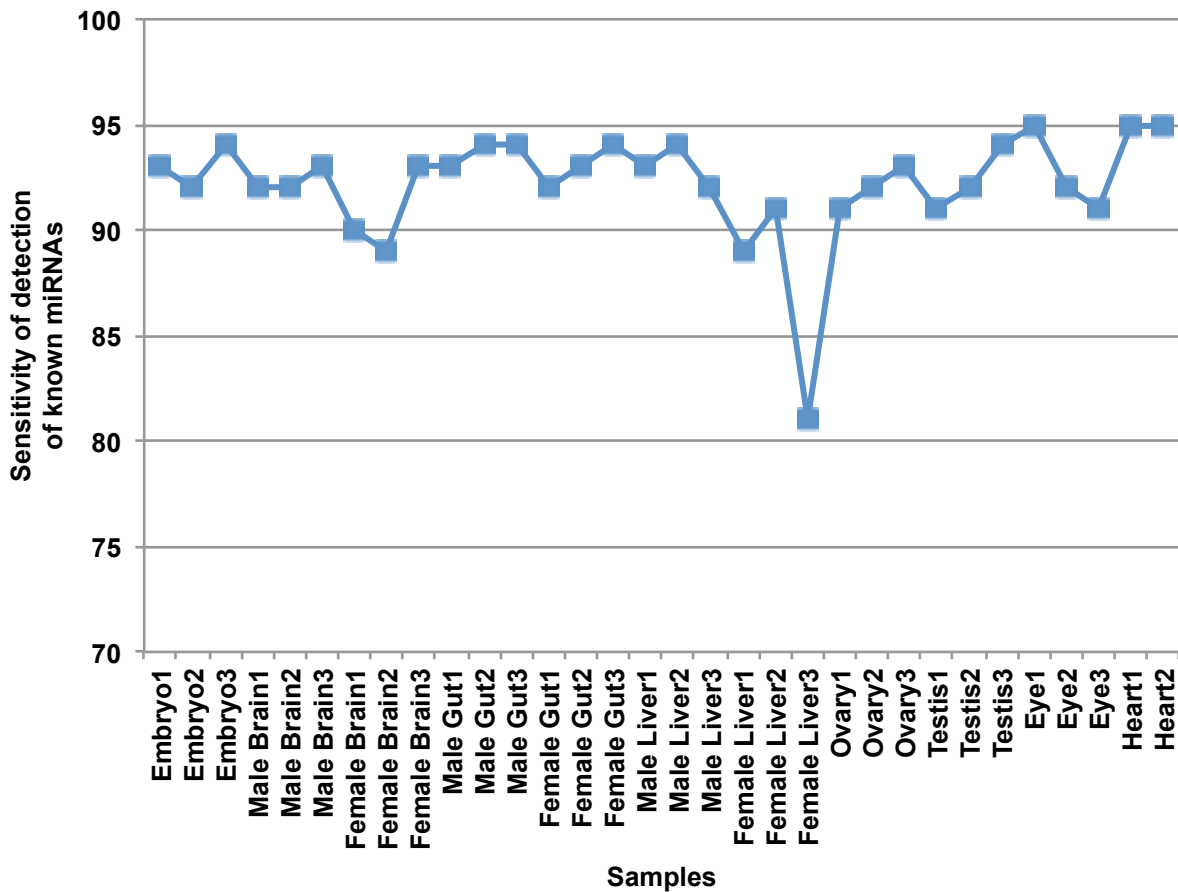

Supplement: 12864_2015_2135_MOESM5_ESM.pdf [file 12864_2015_2135_MOESM5_ESM.pdf]
