# Supplementary material for: Deep sequencing of small RNA facilitates tissue and sex associated microRNA discovery in zebrafish
Source: PubMed Central journal article supplement (PMC4647824; doi:10.1186/s12864-015-2135-7), 2015-11-16
Supplement: 12864_2015_2135_MOESM7_ESM.pdf [file 12864_2015_2135_MOESM7_ESM.pdf]

Provisional ID : gi\_312144711\_ref\_NC\_007130.5\_DanioreriostrainTuebingenchromosome19,Zv9\_6819  
 Score total : 423.2  
 Score for star read(s) : 3.9  
 Score for read counts : 418.2  
 Score for mfe : 1.7  
 Score for randfold : 0  
 Score for cons. seed : -0.6  
 Total read count : 832  
 Mature read count : 831  
 Loop read count : 0  
 Star read count : 1

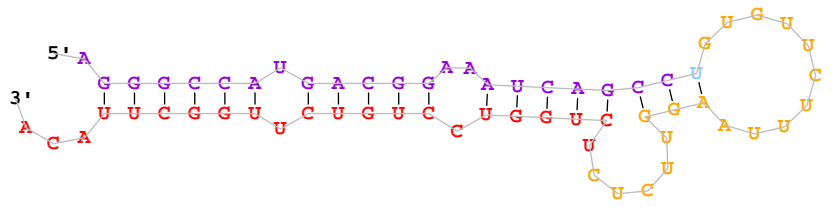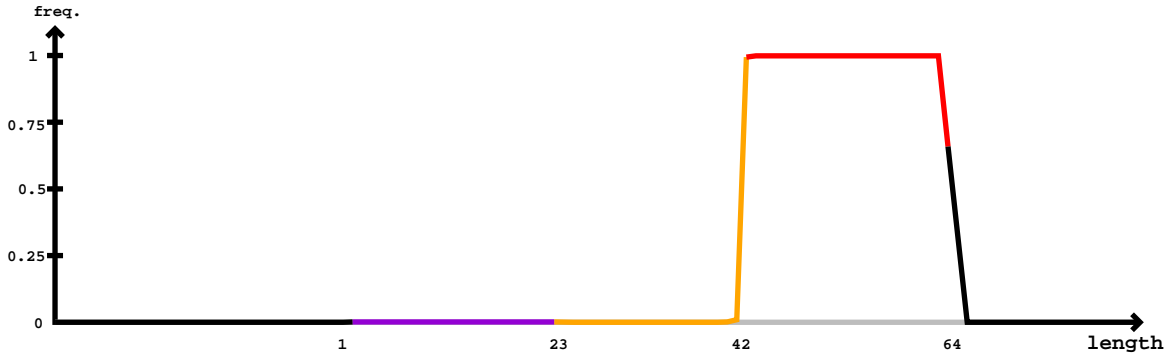

**Star**

**Mature**

| 5' -                                                                                  |                                                                                                    | -3' | obs   | exp | mm | sample |
|---------------------------------------------------------------------------------------|----------------------------------------------------------------------------------------------------|-----|-------|-----|----|--------|
| cuucagucuaauucuggcacucgaugucug                                                        | <b>agggccaugacggaaucagcc</b> uguguucuuuaagguucucucugguccuguc <u>uuggcuuaca</u> ggcuugaguugcacugaca |     |       |     |    |        |
| cuucagucuaauucuggcacucgaugucug                                                        | <b>agggccaugacggaaucagcc</b> uguguucuuuaagguucucucugguccuguc <u>uuggcuuaca</u> ggcuugaguugcacugaca |     |       |     |    |        |
| ..((((((.....((((((((((((((((((((((((.....)))))))))))))))))))))).....)))))))))))))).. |                                                                                                    |     | reads |     |    |        |
| .....cucugguccuguc <u>uuggcuuac</u> .....                                             |                                                                                                    |     | 1     | 0   |    | EMF    |
| .....ucugguccuguc <u>uuggcuuacU</u> .....                                             |                                                                                                    |     | 1     | 1   |    | EMF    |
| .....ucug <u>A</u> uccuguc <u>uuggcuuac</u> .....                                     |                                                                                                    |     | 14    | 1   |    | EMF    |
| .....ucugguccuguc <u>C</u> uggcuuac.....                                              |                                                                                                    |     | 1     | 1   |    | EMF    |
| .....ucugguccuguc <u>uuggcuuac</u> .....                                              |                                                                                                    |     | 37    | 0   |    | EMF    |
| .....ucug <u>A</u> uccuguc <u>uuggcuuaca</u> .....                                    |                                                                                                    |     | 22    | 1   |    | EMF    |
| .....ucugguccuguc <u>uuggcuuacU</u> .....                                             |                                                                                                    |     | 3     | 1   |    | EMF    |
| .....ucugguccuguc <u>uuggcuuaca</u> .....                                             |                                                                                                    |     | 62    | 0   |    | EMF    |
| .....ucugguccuguc <u>uuggcuuacaA</u> .....                                            |                                                                                                    |     | 1     | 1   |    | EMF    |
| .....agggccaugacggaaucagcc.....                                                       |                                                                                                    |     | 1     | 0   |    | EMT    |
| .....ucucugguccuguc <u>uuggcuuac</u> .....                                            |                                                                                                    |     | 1     | 0   |    | EMT    |
| .....cucugguccuguc <u>uuggcuuac</u> .....                                             |                                                                                                    |     | 3     | 0   |    | EMT    |
| .....cucugguccuguc <u>uuggcuuacU</u> .....                                            |                                                                                                    |     | 1     | 1   |    | EMT    |
| .....cucug <u>A</u> uccuguc <u>uuggcuuaca</u> .....                                   |                                                                                                    |     | 1     | 1   |    | EMT    |
| .....ucugguccuguc <u>uuggC</u> uuac.....                                              |                                                                                                    |     | 1     | 1   |    | EMT    |
| .....ucuggCccuguc <u>uuggcuuac</u> .....                                              |                                                                                                    |     | 1     | 1   |    | EMT    |
| .....ucugguccuguc <u>uuggcuuac</u> .....                                              |                                                                                                    |     | 101   | 0   |    | EMT    |
| .....ucug <u>A</u> uccuguc <u>uuggcuuac</u> .....                                     |                                                                                                    |     | 46    | 1   |    | EMT    |
| .....ucuggCccuguc <u>uuggcuuaca</u> .....                                             |                                                                                                    |     | 1     | 1   |    | EMT    |
| .....ucugguccuguc <u>uuggcuuacU</u> .....                                             |                                                                                                    |     | 11    | 1   |    | EMT    |
| .....ucugguccuguc <u>uuggC</u> uuaca.....                                             |                                                                                                    |     | 1     | 1   |    | EMT    |
| .....ucug <u>A</u> uccuguc <u>uuggcuuaca</u> .....                                    |                                                                                                    |     | 100   | 1   |    | EMT    |
| .....ucugguccuguc <u>uuggcuuaca</u> .....                                             |                                                                                                    |     | 188   | 0   |    | EMT    |
| .....ucugguccuguc <u>C</u> uggcuuaca.....                                             |                                                                                                    |     | 1     | 1   |    | EMT    |
| .....ucugguccuguc <u>uuggcuuacUa</u> .....                                            |                                                                                                    |     | 1     | 1   |    | EMT    |
| .....ucugguccuguc <u>uuU</u> gcuuaca.....                                             |                                                                                                    |     | 1     | 1   |    | EMT    |
| .....ucugguccuguc <u>uuggcuuacaU</u> .....                                            |                                                                                                    |     | 4     | 1   |    | EMT    |
| .....ucugguccuguc <u>uuggcuuacaA</u> .....                                            |                                                                                                    |     | 1     | 1   |    | EMT    |
| .....cug <u>A</u> uccuguc <u>uuggcuuaca</u> .....                                     |                                                                                                    |     | 2     | 1   |    | EMT    |
| .....cucug <u>A</u> uccuguc <u>uuggcuuac</u> .....                                    |                                                                                                    |     | 1     | 1   |    | EMS    |
| .....ucuggCccuguc <u>uuggcuuac</u> .....                                              |                                                                                                    |     | 1     | 1   |    | EMS    |

Star

Mature

|                                                                                                              |     |   |     |
|--------------------------------------------------------------------------------------------------------------|-----|---|-----|
| cuucagucuaauucuggcaccgaugucugaggccaugacggaaucagccugugucuuuaagguucucucugguccugucuggcuuacagggcuugaguugcacugaca |     |   |     |
| .....ucugguccugucuggcuuac.....                                                                               | 54  | 0 | EMS |
| .....ucugguccugucuggcuuac.....                                                                               | 1   | 1 | EMS |
| .....ucugAuccugucuggcuuac.....                                                                               | 20  | 1 | EMS |
| .....ucugguccugucuggcuuacU.....                                                                              | 7   | 1 | EMS |
| .....ucugguccAgucuggcuuaca.....                                                                              | 1   | 1 | EMS |
| .....ucugAuccugucuggcuuaca.....                                                                              | 28  | 1 | EMS |
| .....ucugguccugucuggcuuaca.....                                                                              | 107 | 0 | EMS |
| .....ucugguccugucuggcuuacaU.....                                                                             | 1   | 1 | EMS |
| .....cugguccugucuggcuuaca.....                                                                               | 1   | 0 | EMS |
| .....cugAuccugucuggcuuaca.....                                                                               | 1   | 1 | EMS |
