# Supplementary material for: Deep sequencing of small RNA facilitates tissue and sex associated microRNA discovery in zebrafish
Source: PubMed Central journal article supplement (PMC4647824; doi:10.1186/s12864-015-2135-7), 2015-11-16
Supplement: 12864_2015_2135_MOESM8_ESM.pdf [file 12864_2015_2135_MOESM8_ESM.pdf]

>gis-dre-mir-1  
aaaauagcccuuguugaauuaaacguaaauggaagcuuaagcuauauguuaauucaacuagagcuguu  
uag

>5p-matureseq  
aaaauagcccuuguugaauua  
>3p-matureseq  
uaauucaacuagagcuguuuag

~~~~~  
>gis-dre-mir-2  
aaagcagccauugacauccagugggaacuaaaaauacuauugggaguugauggcuguuuuga

>5p-matureseq  
aaagcagccauugacauccagugg  
>3p-matureseq  
augggaguugauggcuguuuuga

~~~~~  
>gis-dre-mir-3  
aaagcugauuacugugacugcagcuuuuacagugugcacugcagucacaguaaucagcuuu

>5p-matureseq  
aaagcugauuacugugacugc  
>3p-matureseq  
ugcagucacaguaaucagcuuu

~~~~~  
>gis-dre-mir-4  
aaaguaacaagugucaagugacgaugguguccagucacuugacacuuguuacuuuuc

>5p-matureseq  
aaaguaacaagugucaagugac  
>3p-matureseq  
cacuugacacuuguuacuuuuc

>3p-matureseq  
ucacuugacacuuguuacuuuu

~~~~~  
>gis-dre-mir-5  
aacaacauggaggacaugcagcagauccuguuccugauuuucugcaugccgucauuguuuuuau

>5p-matureseq  
aacaacauggaggacaugcagc  
>3p-matureseq  
cugcaugccgucauuguuuuuau

~~~~~  
>gis-dre-mir-6  
aacaacaugucacucuaggcuagagcgcuauucugcaguucuuuacuagucuaagagcaacauguuguua  
a

>5p-matureseq  
aacaacaugucacucuaggcu  
>5p-matureseq  
aacaacaugucacucuaggcua

>3p-matureseq  
gucuagagcaacauguuguuaa  
>3p-matureseq  
ucuagagcaacauguuguuaa

~~~~~  
>gis-dre-mir-7  
aacacaccugucuucaaugacugaguucuccuucagguuggguuaguuguguuuug

>5p-matureseq  
aacacaccugucuucaaugacug

>3p-matureseq  
gguuggguuaguuguuug  
~~~~~  
>gis-dre-mir-8  
aacacagggugcacaauagaguucgcuucacuaaugcccucucuaaugccccgugcag  
>5p-matureseq  
aacacagggugcacaauagagu  
>3p-matureseq  
ccucucuaaugccccgugcag  
~~~~~  
>gis-dre-mir-9  
aacauuacucucuugacacuguauuucauauucacugugucagaucgaguauguuug  
>5p-matureseq  
aacauuacucucuugacacugu  
>3p-matureseq  
ugugucagaucgaguauguuug  
~~~~~  
>gis-dre-mir-10  
aaccagcagacguugacaucacauaguaggaagaaaaaaauacuauggaagucaauggcugcugcuucc  
>5p-matureseq  
aaccagcagacguugacaucc  
>3p-matureseq  
aagucaauggcugcugcuucc  
~~~~~  
>gis-dre-mir-11  
aacgcagagcucuaaaaacaucugcgucguggacgcgcugcagcgcauguuuugaagcucugcgcuu  
>5p-matureseq  
aacgcagagcucuaaaaacaucu  
>3p-matureseq  
gcauguuuugaagcucugcgcuu  
~~~~~  
>gis-dre-mir-12  
aacuuguccuggaagcuggagguguauagacaaucccuuagcucucaugacaugauuu  
>5p-matureseq  
aacuuguccuggaagcuggaggu  
>3p-matureseq  
uuagcucucaugacaugauuu  
~~~~~  
>gis-dre-mir-13  
aagcaggaacuguugacaucacauaguaaacagaggauggaagucaacaguuccugcuaucc  
>5p-matureseq  
aagcaggaacuguugacaucc  
>3p-matureseq  
gaagucaacaguuccugcuaucc  
~~~~~  
>gis-dre-mir-14  
aaggcuuuucaccauuuggaugaaguaaugguugccccaucacuggaauugaagguuauug  
>5p-matureseq  
aaggcuuuucaccauuuggau  
>3p-matureseq  
uccaucuggaauugaagguuauug  
~~~~~  
>gis-dre-mir-15  
aaggcuuuucaccauuuggaucaguaaugauugccccaucacuggaauugacaagguuauug

>5p-matureseq  
aaggcuuuucaccuuuuuggau  
>3p-matureseq  
uccaucuggauugacaaguuaug  
~~~~~  
>gis-dre-mir-16  
aaggcuuuucaccuuuuuggaugcaguaaugguugccccaaccaacuggauugaaaaguuaug  
>5p-matureseq  
aaggcuuuucaccuuuuuggau  
>3p-matureseq  
uccaacuggauugaaaaguuaug  
~~~~~  
>gis-dre-mir-17  
aaggcuuuucaccuuuuuggaugcaguaaugguugccccaaccaucuggauugacaaguuaug  
>5p-matureseq  
aaggcuuuucaccuuuuuggau  
>3p-matureseq  
uccaucuggauugacaaguuaug  
~~~~~  
>gis-dre-mir-18  
aaggcuuuucaccuuuuuggaugcaguaaugguugccccguccaucuggauugaacaguuaug  
>5p-matureseq  
aaggcuuuucaccuuuuuggau  
>3p-matureseq  
uccaucuggauugaacaguuaug  
~~~~~  
>gis-dre-mir-19  
aaguuuucugguucuugagucguucguucaucacgugacagaaugacucgaacccgaggacucg  
>5p-matureseq  
aaguuuucugguucuugagucg  
>5p-matureseq  
aaguuuucugguucuugagucgu  
>5p-matureseq  
aaguuuucugguucuugagucguucg  
>3p-matureseq  
augacucgaacccgaggacucg  
~~~~~  
>gis-dre-mir-20  
aaguuuucugguucuugagucguuuguucaucaugacagaugacucuaaacccaaggacucg  
>5p-matureseq  
aaguuuucugguucuugagucg  
>5p-matureseq  
aaguuuucugguucuugagucgu  
>3p-matureseq  
augacucuaaacccaaggacucg  
~~~~~  
>gis-dre-mir-21  
aaugcugaaugccauugaugucuauguuuuuuuuccuacuauggaaguuaaugguguuuagcau  
ucu  
>3p-matureseq  
aaguuaaugguguuuagcauucu  
>5p-matureseq  
aaugcugaaugccauugaugucu  
>3p-matureseq

aguuaaugguguuuagcauucu  
~~~~~  
>gis-dre-mir-22  
aaugcugauuuuggaucuugugcccugauaauuaagaaacgcuuugaauaacaugggucugauccucu  
gucagcagucu  
>5p-matureseq  
aaugcugauuuuggaucuugugc  
>5p-matureseq  
aaugcugauuuuggaucuugugccc  
>3p-matureseq  
ucugauccucugucagcagucu  
~~~~~  
>gis-dre-mir-23  
aauguucugugaccauugaaaucgguuuucacagauuucgauagucacagaauauggu  
>5p-matureseq  
aauguucugugaccauugaaa  
>3p-matureseq  
uucgauagucacagaauauggu  
~~~~~  
>gis-dre-mir-24  
aauuauugauauguggccagauguaaaauguaguauuuuggcccagauguuaauaaauuga  
>5p-matureseq  
aauuauugauauguggccaga  
>3p-matureseq  
uggcccagauguuaauaaauuga  
~~~~~  
>gis-dre-mir-25  
acacgccacuaaaugcagagcaacuguaacuucagugggcuaccucacaguggcucugcauuuagu  
ggcguguuu  
>5p-matureseq  
acacgccacuaaaugcagagc  
>3p-matureseq  
ucugcauuuaguggguguuu  
~~~~~  
>gis-dre-mir-26  
acacugaaaggguauguaaaucaccaacaguuaacacaaaaugaagcucauagugaauaugccuguug  
uguag  
>5p-matureseq  
acacugaaaggguauguaaaucaccaaca  
>3p-matureseq  
auagugaauaugccuguuguguag  
~~~~~  
>gis-dre-mir-27  
acacugaaaggguauguaaaucaccaacaguuaacacacaaaugaagcucauagugaauaugccuguug  
uguag  
>5p-matureseq  
acacugaaaggguauguaaaucaccaaca  
>3p-matureseq  
auagugaauaugccuguuguguag  
~~~~~  
>gis-dre-mir-28  
acagagagucagugauuaggcugcaaaacaaagcugauuagccuagccucugucugucugugu  
>5p-matureseq  
acagagagucagugauuaggcu

>3p-matureseq  
ccuagccucugucugucugugu  
~~~~~  
>gis-dre-mir-29  
acagccagugacuuccauagcauuuuuguuuuuucgaccauggaggucaauggcugcau  
>5p-matureseq  
acagccagugacuuccauagc  
>3p-matureseq  
cauggaggucaauggcugcau  
~~~~~  
>gis-dre-mir-30  
acagcuacuguaaacucucuaaaguaaaagggcauguaagagugacaguugcuacgg  
>5p-matureseq  
acagcuacuguaaacucucuaaagu  
>3p-matureseq  
uaagagugacaguugcuacgg  
~~~~~  
>gis-dre-mir-31  
accgguaaccaucgacuuccauaguaggaaaaacaaaugcuaugaaaguuaaugguuauucgguuu  
>5p-matureseq  
accgguaaccaucgacuuccau  
>3p-matureseq  
gaaaguuaaugguuauucgguuu  
~~~~~  
>gis-dre-mir-32  
acggauagaaucagcggagcugggagcgcucucucucucccgucuccgcugauuuugucagug  
>5p-matureseq  
acggauagaaucagcggagcugg  
>3p-matureseq  
cgcuccgcugauuuugucagug  
~~~~~  
>gis-dre-mir-33  
acuggcacucauugacuucuguaguauuuuuuuuguuuucuaugaaagucuaauugguggcagcca  
>5p-matureseq  
acuggcacucauugacuucugu  
>3p-matureseq  
ugaaagucuaauugguggcagcca  
~~~~~  
>gis-dre-mir-34  
acuugaggcaggugugcaugagcggcgccgaggaaacgcugguucugaaggagguggcucgugcagag  
gugucgugg  
>5p-matureseq  
acuugaggcaggugugcaugagcggcgc  
>3p-matureseq  
ggcucgugcagaggugucgugg  
~~~~~  
>gis-dre-mir-35  
acuungcucacgugacuuggguguuucaaaauagcuuaagucaugugaucuaggggaa  
>5p-matureseq  
acuungcucacgugacuugggu  
>3p-matureseq  
uaagucaugugaucuaggggaa  
~~~~~  
>gis-dre-mir-36

agaaaucagauucuccacauacacuuugacuaaaugcuucuguguggagaucugauuuucag  
>5p-matureseq  
agaaaucagauucuccacauaca  
>3p-matureseq  
uguguggagaucugauuuucag  
~~~~~  
>gis-dre-mir-37  
agaaugcacaccugaggugacgagauguggcuguuacaccucaggugugcauuuuu  
>5p-matureseq  
agaaugcacaccugaggugacg  
>3p-matureseq  
uuacaccucaggugugcauuuuu  
~~~~~  
>gis-dre-mir-38  
agacaccucuguuaucaaaacuaaaacaaacaugagauucauuugcugcucgcuuuguugauaacagag  
guguccu  
>5p-matureseq  
agacaccucuguuaucaaaacu  
>3p-matureseq  
uguugauaacagagguguccu  
~~~~~  
>gis-dre-mir-39  
agacgcugacucugauggguuagucagugagaugaaccugucgggcggcgaaca  
>5p-matureseq  
agacgcugacucugauggguua  
>3p-matureseq  
ugaaccugucgggcggcgaaca  
~~~~~  
>gis-dre-mir-40  
agacuaguagccauugagauuuuuuuucuuuuuaggauguuaguggcuacugguuuca  
>5p-matureseq  
agacuaguagccauugagaucu  
>3p-matureseq  
auguuaguggcuacugguuuca  
~~~~~  
>gis-dre-mir-41  
agacuccaucauggugcgguucagcugauaugaccuggguuucugaacucacacagaaggagcucc  
>3p-matureseq  
acucacacagaaggagcucc  
>5p-matureseq  
agacuccaucauggugcgguuc  
~~~~~  
>gis-dre-mir-42  
agagagaaaagucaauggcuuaaguggcuggagucgcugaugauucucuuggc  
>5p-matureseq  
agagagaaaagucaauggcuua  
>3p-matureseq  
agucgcugaugauucucuuggc  
~~~~~  
>gis-dre-mir-43  
agagagaaaagucaauggcuugaguggcuggaguuacugauaaucuuuuggc  
>5p-matureseq  
agagagaaaagucaauggcuug  
>3p-matureseq

aguuacugauaaauucuuuuggc  
~~~~~  
>gis-dre-mir-44  
agagagaaaagucuauggcuuggguggcaggagucgcugauaaucucuuggc  
>5p-matureseq  
agagagaaaagucuauggcuug  
>3p-matureseq  
agucgcugauaaucucuuggc  
>3p-matureseq  
gagucgcugauaaucucuuggc  
~~~~~  
>gis-dre-mir-45  
agagagaaaagucuauggcuuggguggcuggagucacugauaaucucuuggcu  
>5p-matureseq  
agagagaaaagucuauggcuug  
>3p-matureseq  
agucacugauaaucucuuggc  
>3p-matureseq  
gucacugauaaucucuuggcu  
>3p-matureseq  
ucacugauaaucucuuggcu  
~~~~~  
>gis-dre-mir-46  
agagagaaaagucuguggcuugggugacuggagucgcugauaaucucuuggc  
>5p-matureseq  
agagagaaaagucuguggcuug  
>3p-matureseq  
agucgcugauaaucucuuggc  
>3p-matureseq  
gagucgcugauaaucucuuggc  
~~~~~  
>gis-dre-mir-47  
agagagaaaagucuguggcuuggguggcuggagucacuaauuuucucuuggc  
>5p-matureseq  
agagagaaaagucuguggcuug  
>3p-matureseq  
agucacuaauuuucucuuggc  
~~~~~  
>gis-dre-mir-48  
agagagaaaagucuuuggcuugggugacuggagucuaugauaaucucuuggc  
>5p-matureseq  
agagagaaaagucuuuggcuug  
>3p-matureseq  
agucacuaauuuucucuuggc  
>3p-matureseq  
gucauugauaaucucuuggc  
~~~~~  
>gis-dre-mir-49  
agagagaaaagucuauggcuuggguggcuggagucgcugaugauuaucucuuggc  
>5p-matureseq  
agagagaaaagucuauggcuug  
>3p-matureseq  
agucgcugaugauuaucucuuggc  
~~~~~

>gis-dre-mir-50  
agagaggaaagucuaugucuugggguggcuggagucuaugauaaauucucuuggc  
>5p-matureseq  
agagaggaaagucuaugucuug  
>3p-matureseq  
agucuaugauaaauucucuuggc  
>3p-matureseq  
gucauugauaaauucucuuggc  
~~~~~  
>gis-dre-mir-51  
agagcguaggcuggggccguggagaggcgucugugcacugccuccagcugacagcuccu  
>5p-matureseq  
agagcguaggcuggggccgugga  
>3p-matureseq  
cugccuccagcugacagcuccu  
~~~~~  
>gis-dre-mir-52  
agaggcuguccgagugcugauuuacauuaaugucacgacuaucagcacucggacagccucuuc  
>5p-matureseq  
agaggcuguccgagugcugaua  
>5p-matureseq  
gaggcuguccgagugcugaua  
>3p-matureseq  
ucagcacucggacagccucuuc  
~~~~~  
>gis-dre-mir-53  
agagggaaaagucuauggcuugggguggcuggagucgcugaugauucucuuggcu  
>5p-matureseq  
agagggaaaagucuauggcuug  
>3p-matureseq  
agucgcugaugauucucuuggc  
>3p-matureseq  
ucgcugaugauucucuuggcu  
~~~~~  
>gis-dre-mir-54  
agauagaaucagcggagcggggagaacucucucucccagcuccgcugauucugucagu  
>5p-matureseq  
agauagaaucagcggagcgggg  
>3p-matureseq  
cagcuccgcugauucugucagu  
~~~~~  
>gis-dre-mir-55  
agaucuacuuugauuguucagaugacucugcucugcucugauuggucaaaauaggucuaca  
>5p-matureseq  
agaucuacuuugauuguucaga  
>3p-matureseq  
ugauuggucaaaauaggucuac  
>3p-matureseq  
ugauuggucaaaauaggucuaca  
~~~~~  
>gis-dre-mir-56  
agauucaucacgacugacgguguacgacggaggaguagaucgacggggacuugacccuu  
>5p-matureseq  
agauucaucacgacugacgguguacga



>3p-matureseq  
guagaucgacggggacuugacccuu  
~~~~~  
>gis-dre-mir-57  
agauuuagcacacuucuggcauauuuaucauguuguuaguagugucuaagucaug  
>5p-matureseq  
agauuuagcacacuucuggca  
>3p-matureseq  
uuaguagugucuaagucaug  
~~~~~  
>gis-dre-mir-58  
agcaaucuagccugugcagauguguaguucuccagcgauucugcccaggccagacuacuagu  
>5p-matureseq  
agcaaucuagccugugcagaug  
>3p-matureseq  
ucugcccaggccagacuacuagu  
~~~~~  
>gis-dre-mir-59  
agcagcacaaguacuauaggagagcgucaugauaaaggcucgguacacuuguguuugacc  
>5p-matureseq  
agcagcacaaguacuauaggagagc  
>3p-matureseq  
ucgguacacuuguguuugacc  
~~~~~  
>gis-dre-mir-60  
agccaaccaggcacgugcaguggaguuuacugguucagugggcaugggcucauccgccggacucggga  
ccgccggucugcugacugg  
>5p-matureseq  
agccaaccaggcacgugcaguggagu  
>3p-matureseq  
ucgggaccgccggucugcugacugg  
~~~~~  
>gis-dre-mir-61  
agccauuuccagccuggucuuagcuguucagacuggaaaaugaccagccaaauccagcuaaaaccagc  
uugaccagccuggacauagcugg  
>5p-matureseq  
agccauuuccagccuggucuuagc  
>3p-matureseq  
uugaccagccuggacauagcugg  
~~~~~  
>gis-dre-mir-62  
agccauuugcugaguccaagauucaguuccuggacucagcaaauggcuca  
>5p-matureseq  
agccauuugcugaguccaaga  
>3p-matureseq  
cuggacucagcaaauggcuca  
~~~~~  
>gis-dre-mir-63  
agccgacucgcagcucucugucuccaaauggcgcguugugagcgaggagagaccgugagucgguag  
c  
>3p-matureseq  
agagagaccgugagucgguagc  
>5p-matureseq  
agccgacucgcagcucucugucu

>5p-matureseq  
agccgacucgcagcucucugucucc  
~~~~~

>gis-dre-mir-64  
agcggagcccuauauugaccauauagucauaaaugaucaauauguggcuuccucu  
>5p-matureseq  
agcggagcccuauauugaccu  
>3p-matureseq  
ugaucaauauguggcuuccucu  
~~~~~

>gis-dre-mir-65  
agcggcgucagaagcgauggccgugucucuaucceaauaggucgggucgcaaugacgucacc  
>5p-matureseq  
agcggcgucagaagcgauggcc  
>5p-matureseq  
agcggcgucagaagcgauggccg  
>3p-matureseq  
gucgggucgcaaugacgucacc  
~~~~~

>gis-dre-mir-66  
agcuguauccuauuuagacuuuaccgucugcaggagagugugaagucuaugaugcgauacagaug  
>5p-matureseq  
agcuguauccuauuuagacuuu  
>3p-matureseq  
gaagucuaugaugcgauacagaug  
~~~~~

>gis-dre-mir-67  
aggaukcaggacuccgcucugaauaaugaggaaaagaccaucagagaggagaaugucugcagccccg  
c  
>5p-matureseq  
aggaukcaggacuccgcucug  
>3p-matureseq  
gagaggagaaugucugcagccccgc  
~~~~~

>gis-dre-mir-68  
aggcuguccgagucgugauagucgugacauuaauguaauaucagcacucggacagccucuuc  
>5p-matureseq  
aggcuguccgagucgugauagu  
>3p-matureseq  
ucagcacucggacagccucuuc  
~~~~~

>gis-dre-mir-69  
agguuuguacugagacugacuuuaaaguaaagugaugcugaggucuucucuguaccaaucaag  
>5p-matureseq  
agguuuguacugagacugacu  
>3p-matureseq  
ucuucucuguaccaaucaag  
~~~~~

>gis-dre-mir-70  
agucuccauguaucuguguuugcacugggugaagagcgaaaaacugagugccaacacagauacacgga  
gacugg  
>3p-matureseq  
aacacagauacacggagacugg  
>5p-matureseq

agucuccauguaucuguguuug  
~~~~~  
>gis-dre-mir-71  
agucuccguguaucuguguuugcacugggugaagagcgguaaacugagugcgaacacagauacacgga  
gacuga  
>3p-matureseq  
aacacagauacacggagacuga  
>5p-matureseq  
agucuccguguaucuguguuug  
>5p-matureseq  
agucuccguguaucuguguuugc  
>5p-matureseq  
gucuccguguaucuguguuug  
~~~~~  
>gis-dre-mir-72  
agucuucguucugcaucgggacuaccuuguaucagccacgauguaaacucaagaccu  
>5p-matureseq  
agucuucguucugcaucggga  
>3p-matureseq  
ccacgauguaaacucaagaccu  
~~~~~  
>gis-dre-mir-73  
agucuucugguucuugagucguucguucaucaugugacagaccgacucuaacccgaggacucg  
>5p-matureseq  
agucuucugguucuugagucguuc  
>3p-matureseq  
ccgacucuaacccgaggacucg  
~~~~~  
>gis-dre-mir-74  
agugcuguucuggaanguauucagguuugguuucuucugaaucucugagcccagcgcuga  
>3p-matureseq  
aaucucugagcccagcgcuga  
>5p-matureseq  
agugcuguucuggaanguauuca  
~~~~~  
>gis-dre-mir-75  
aguucaggaggagacagcucuggggaaaaagcuguuccucagucugcugguuuuuuuccgggggagc  
cu  
>5p-matureseq  
aguucaggaggagacagcucu  
>3p-matureseq  
ugcugguuuuuuuccgggggagccu  
~~~~~  
>gis-dre-mir-76  
aguucuauagcaguguuugguaucauucagcggaggaaccacacacaacuauagcacugc  
>5p-matureseq  
aguucuauagcaguguuugguu  
>3p-matureseq  
ccacacacaacuauagcacugc  
~~~~~  
>gis-dre-mir-77  
aguuuauuguauggagcgcgucugucagucagcgcuuauacauacuggu  
>5p-matureseq  
aguuuauuguauggagcgcgucugu

>3p-matureseq  
gucagcgcuuauacauacuggu  
~~~~~  
>gis-dre-mir-78  
aguuucgguuagugacucaugccuggaauucaggcuggcuuacucucacguugu  
>5p-matureseq  
aguuucgguuagugacucaugcc  
>3p-matureseq  
cuggcuuacucucacguugu  
~~~~~  
>gis-dre-mir-79  
aucgguuugaugaucuucagacgugacaauauauaucaguuugaccaucuucagacgugacuauuggu  
uugacgaucuucagacgugacu  
>5p-matureseq  
aucgguuugaugaucuucagac  
>3p-matureseq  
uugaccaucuucagacgugacua  
>3p-matureseq  
uugacgaucuucagacgugacu  
>3p-matureseq  
uuugaccaucuucagacguga  
>3p-matureseq  
uuugacgaucuucagacgugacu  
~~~~~  
>gis-dre-mir-80  
aucuucagauugaucuccaucugucaacagauuuuagagagauccacugauggaacagcugauagacgu  
>5p-matureseq  
aucuucagauugaucuccaucuguc  
>3p-matureseq  
ugauggaacagcugauagacgu  
~~~~~  
>gis-dre-mir-81  
aucuuuguucuggcuauauugaaggaguauucagaauguagccugaacaaaaccugauug  
>5p-matureseq  
aucuuuguucuggcuaua  
>3p-matureseq  
guagccugaacaaaaccugauu  
>3p-matureseq  
uagccugaacaaaaccugauug  
~~~~~  
>gis-dre-mir-82  
augaagucaaugcaaagauuggauuaggcauccauuucaaucuuugcauugccuugaugu  
>3p-matureseq  
aaucuuugcauugccuugaugu  
>3p-matureseq  
aucuuugcauugccuugaugu  
>5p-matureseq  
augaagucaaugcaaagauugg  
>5p-matureseq  
augaagucaaugcaaagauugga  
~~~~~  
>gis-dre-mir-83  
augaguguacuguuggcugcugggaacacuucgugacgacugaaaccaaaggaaaagaggaacuggcu  
uuguuuc

>3p-matureseq  
aggaaaagaggaacuggcuuuguuuc  
>5p-matureseq  
augaguguacuguuggcugcu  
~~~~~  
>gis-dre-mir-84  
augauacacagcagcaucauggguaauguaguuuugcaccaugaaugcugcuguauaucauu  
>3p-matureseq  
augaaugcugcuguauaucauu  
>5p-matureseq  
augauacacagcagcaucauggg  
~~~~~  
>gis-dre-mir-85  
augauguccauuucugcugcgcugugguugucaggagugcaagaauaggaccuucaggc  
>5p-matureseq  
augauguccauuucugcugcg  
>3p-matureseq  
caagaauaggaccuucaggc  
~~~~~  
>gis-dre-mir-86  
auucacuaugacugucccuuguuccaaaaucuuacgagggagagucaauagugaacaca  
>3p-matureseq  
agggagagucaauagugaacaca  
>5p-matureseq  
auucacuaugacugucccuug  
~~~~~  
>gis-dre-mir-87  
auuccggcgcggaugcggcagcugcggcucgcuuacggccgcccgaucuggccggaucg  
>5p-matureseq  
auuccggcgcggaugcggcag  
>5p-matureseq  
auuccggcgcggaugcggcagcg  
>3p-matureseq  
cgccgcaucuggccggaucg  
~~~~~  
>gis-dre-mir-88  
auuccggcgcggaugcggcagcugcggcucgcuuacggcugcccgaucuggcccgaucg  
>5p-matureseq  
auuccggcgcggaugcggcag  
>5p-matureseq  
auuccggcgcggaugcggcagcg  
>3p-matureseq  
gccgcaucuggcccgaucg  
~~~~~  
>gis-dre-mir-89  
auuccggcgcggaugcggcagcguuggcucgcuuacggccgcccgaucuggcccggaauuga  
>5p-matureseq  
auuccggcgcggaugcggcag  
>5p-matureseq  
auuccggcgcggaugcggcagcg  
>3p-matureseq  
cgccgcaucuggcccggaauuga  
~~~~~  
>gis-dre-mir-90

caucagcugaucugucugcaagcugagauaugagugauccgcugauggauugacugauuggc  
>5p-matureseq  
caucagcugaucugucugca  
>3p-matureseq  
cugauggauugacugauuggc  
~~~~~  
>gis-dre-mir-91  
cacauuugggcgaguucuuugaucaucuugaauucaugguacuccuuggauguugac  
>3p-matureseq  
augguacuccuuggauguugac  
>5p-matureseq  
cacauuugggcgaguucuuuga  
~~~~~  
>gis-dre-mir-92  
cacgaccagcccagccgcguggaauuggagcagcgcagcccggacucggucaagg  
>5p-matureseq  
cacgaccagcccagccgcgugga  
>3p-matureseq  
cgcagcccggacucggucaagg  
~~~~~  
>gis-dre-mir-93  
cacgcccacuaaaugcagagccacugugagguacgcccacugaaaguacaguugcucugcauuuagug  
ggcguguuu  
>5p-matureseq  
cacgcccacuaaaugcagagcca  
>3p-matureseq  
ucugcauuuagugggcguguuu  
~~~~~  
>gis-dre-mir-94  
cagaggaagaccgacaggugaagcacacaccgcaccugugcugauugauugaucaccugugcugaugu  
cugcuuccu  
>5p-matureseq  
agaggaagaccgacaggug  
>5p-matureseq  
cagaggaagaccgacaggug  
>3p-matureseq  
ccugugcugaugucugcuucc  
>3p-matureseq  
ccugugcugaugucugcuuccu  
~~~~~  
>gis-dre-mir-95  
cagcagauucuuggucuucagagucugaauuccuucuuucugagucuuugagaucugcaga  
>5p-matureseq  
cagcagauucuuggucuucaga  
>3p-matureseq  
ucugagucuuugagaucugcaga  
~~~~~  
>gis-dre-mir-96  
cagccccggucuugaaucugguccagacuaaacauuugggcugaucagugacugcggcugcu  
>5p-matureseq  
cagccccggucuugaaucuggucc  
>3p-matureseq  
gcugaucagugacugcggcugcu  
~~~~~

>gis-dre-mir-97  
cagcguccucuccaagccugacugacaauaauuggacagaggcugaagacggggcgugc  
>3p-matureseq  
agaggcugaagacggggcgugc  
>5p-matureseq  
cagcguccucuccaagccugacu  
~~~~~  
>gis-dre-mir-98  
caggacauccaauccgacagaccuugaguauagauucugaucagugggauuuggaggccaggc  
>5p-matureseq  
caggacauccaauccgacagacc  
>3p-matureseq  
ucagugggauuuggaggccaggc  
~~~~~  
>gis-dre-mir-99  
cagucucucuggaucagugguuuuucuuacagcagcgucucagaucugugacagacagga  
>5p-matureseq  
cagucucucuggaucaguggu  
>3p-matureseq  
ucagaucugugacagacagga  
~~~~~  
>gis-dre-mir-100  
caguuccccguccuguugguguuguaauuuuagucuuacaaagugggucggagagcuguu  
>3p-matureseq  
caaagugggucggagagcuguu  
>5p-matureseq  
caguuccccguccuguugguguu  
~~~~~  
>gis-dre-mir-101  
caguuugguucgguaggccuuuugacaguggaaacagccauaaaagcuuaccaaaccguaccgua  
>3p-matureseq  
agcuuaccaaaccguaccgua  
>5p-matureseq  
caguuugguucgguaggccuuu  
~~~~~  
>gis-dre-mir-102  
caguuugguucgguaggccuuuugacaguggaaacggccaauaaaagcguaccaaaccgaaccaua  
>3p-matureseq  
aaaagcguaccaaaccgaacc  
>3p-matureseq  
agcguaccaaaccgaaccaua  
>3p-matureseq  
auaaaagcguaccaaaccgaacc  
>5p-matureseq  
caguuugguucgguaggccuuu  
>3p-matureseq  
uaaaagcguaccaaaccgaacc  
~~~~~  
>gis-dre-mir-103  
caucaaaugucaucgcgaucaucauaguagaagugaucgcuaugacauuugaugacg  
>3p-matureseq  
aucgcuaugacauuugaugacg  
>5p-matureseq  
caucaaaugucaucgcgaucau

~~~~~  
>gis-dre-mir-104  
caucuggucuaguugcaggagucaaaauuuucaacggacccgcagcucaaaucagaucu  
>3p-matureseq  
acccgcagcucaaaucagaucu  
>5p-matureseq  
caucuggucuaguugcaggaguu  
~~~~~  
>gis-dre-mir-105  
caugaugaugccuugaucagaugcugacugugacauuaagugacggcuugaucaggauucaucaucg  
cc  
>5p-matureseq  
caugaugaugccuugaucaga  
>3p-matureseq  
cuugaucaggauucaucaucgcc  
~~~~~  
>gis-dre-mir-106  
caugcacugucaaccugacaccuuauauagacagguguaugcguuuucaggucauguc  
>5p-matureseq  
caugcacugucaaccugacac  
>3p-matureseq  
uguaugcguuuucaggucauguc  
~~~~~  
>gis-dre-mir-107  
cauuagaggucuuuuuacuguuuguaucacugcuuuuuuaguguccuccagagc  
>5p-matureseq  
cauuagaggucuuuuuacugu  
>3p-matureseq  
uuuuuuuaguguccuccagagc  
~~~~~  
>gis-dre-mir-108  
ccaaaucguauguuacacugugaauacuguaaaggccuguuuguucgcaaggagcuguggcguc  
>5p-matureseq  
ccaaaucguauguuacacugugaauacugu  
>3p-matureseq  
uuuguucgcaaggagcuguggcguc  
~~~~~  
>gis-dre-mir-109  
ccaaucaacuugagucuggguuuuugaucucagcugcauccagcagguguuuucggagcagacuucgac  
uugauugggu  
>5p-matureseq  
ccaaucaacuugagucuggguuuu  
>3p-matureseq  
gcagacuucgacuugauugggu  
~~~~~  
>gis-dre-mir-110  
ccaccacugcaauuccaucaugaugaaaaagaagucugagaaaugcuguaauuggugua  
>5p-matureseq  
ccaccacugcaauuccaucaugaugaaaa  
>3p-matureseq  
ucugagaaaugcuguaauuggugua  
~~~~~  
>gis-dre-mir-111  
ccaguuccacaauuugccauauucugugcauacuugaaacauaaaaauuggcaaaauguggaacuagc



>5p-matureseq  
ccaguuccacaauuugccauau  
>3p-matureseq  
uauggcaaaauguggaacuagc  
~~~~~  
>gis-dre-mir-112  
ccauccacaucaagguucgacaugugcacaacaugucgaaccuugauguggaugggcu  
>5p-matureseq  
ccauccacaucaagguucgaca  
>3p-matureseq  
ucgaaccuugauguggaugggcu  
~~~~~  
>gis-dre-mir-113  
ccauccacaucaagguucgacauguugugcacaugucgaaccuugauguggaugggcu  
>5p-matureseq  
ccauccacaucaagguucgaca  
>3p-matureseq  
ucgaaccuugauguggaugggcu  
~~~~~  
>gis-dre-mir-114  
ccauuugggcagagcugagcuccagugaggggcucaugcucggcuggagcgcagcucugcuca  
aauggcu  
>3p-matureseq  
agcgcagcucugcucaauggcu  
>5p-matureseq  
ccauuugggcagagcugagcu  
>5p-matureseq  
ccauuugggcagagcugagcucc  
>3p-matureseq  
cgcagcucugcucaauggcu  
~~~~~  
>gis-dre-mir-115  
cccagaauucaaggaccaaccaucuucucaacgcuugaugugguccugccuucuggacg  
>5p-matureseq  
cccagaauucaaggaccaaccau  
>3p-matureseq  
ugugguccugccuucuggacg  
~~~~~  
>gis-dre-mir-116  
cccccgcauguccuugagccccgcaucugucugcugugcucagagugguugugcgggugu  
>5p-matureseq  
cccccgcauguccuugagcccc  
>3p-matureseq  
gcucagagugguugugcgggugu  
~~~~~  
>gis-dre-mir-117  
ccgagcuugugcagauaguggaaugguaccaacaagagauaguugggcucaccuccacacacagcuug  
ggc  
>5p-matureseq  
ccgagcuugugcagauaguggaauggua  
>3p-matureseq  
ucaccuccacacacagcuugggc  
~~~~~  
>gis-dre-mir-118

ccgagcuugugcgggagguggaacgauacugacuagggcucaccuccacacauagcuuggg  
>5p-matureseq  
ccgagcuugugcgggaggugga  
>3p-matureseq  
ucaccuccacacauagcuuggg  
~~~~~  
>gis-dre-mir-119  
ccgccccgucucugcuaccucauaaauaagucuaaauugugagucggcggaggcagggugacg  
>5p-matureseq  
ccgccccgucucugcuaccu  
>5p-matureseq  
ccgccccgucucugcuaccuca  
>3p-matureseq  
gucggcggaggcagggugacg  
~~~~~  
>gis-dre-mir-120  
ccggaauauagaguuggauugggcucucagaguuggguauccauggcaucaguagagaagccacaac  
cgauuguuuaauuuuugug  
>3p-matureseq  
ccacaaccgauuguuuaauuuuugug  
>5p-matureseq  
ccggaauauagaguuggauugggcu  
~~~~~  
>gis-dre-mir-121  
ccgugccugauaaacagggacucugcuuuauagcgaucaaaaagcgccugauaucagcgcacuggca  
g  
>5p-matureseq  
ccgugccugauaaacagggacu  
>3p-matureseq  
cgccugauaucagcgcacuggcag  
~~~~~  
>gis-dre-mir-122  
ccguggagugaucaaggaggacgagauuuacacucuccuccuucccaccacgaugagg  
>3p-matureseq  
cccuccuucccaccacgaugagg  
>5p-matureseq  
ccguggagugaucaaggaggacg  
~~~~~  
>gis-dre-mir-123  
ccuagaaaucuggaaaagugcuggaguuuugacaaggcauuuuccaggcuuucuaggac  
>3p-matureseq  
cauuuuccaggcuuucuaggac  
>5p-matureseq  
ccuagaaaucuggaaaagugcu  
~~~~~  
>gis-dre-mir-124  
ccucgagcccagugcuuccuccuguuggcagagcgaguggggagccugagcucgguggau  
>5p-matureseq  
ccucgagcccagugcuuccuccu  
>3p-matureseq  
uggggagccugagcucgguggau  
~~~~~  
>gis-dre-mir-125  
cgaaccgacagaaaacacaugugaaaacacaacauacguguguuuucugucgguucguu

>5p-matureseq  
cgaaccgacagaaaacacaugu  
>3p-matureseq  
guguguuuucugucgguucguu  
~~~~~  
>gis-dre-mir-126  
cggccgauuggccggccgcccggucgaucguucagucguucggccggccagucggacaga  
>5p-matureseq  
cggccgauuggccggccgcccg  
>3p-matureseq  
uucggccggccagucggacaga  
~~~~~  
>gis-dre-mir-127  
cggcugugcauggaacucuggagacggcacuggccauuuaggaacucuggacaccuga  
>5p-matureseq  
cggcugugcauggaacucugga  
>3p-matureseq  
uaggaacucuggacaccuga  
~~~~~  
>gis-dre-mir-128  
cgguuugguacgcuucuguggccguuuccacugucaauaaguguaccaaaccaaac  
>3p-matureseq  
caauaaguguaccaaaccaaac  
>5p-matureseq  
cgguuugguacgcuucugug  
~~~~~  
>gis-dre-mir-129  
cgucuacagauacugcuggagagauagaguaugaaaacuccuccacugucucugucggcguc  
>5p-matureseq  
cgucuacagauacugcuggagag  
>3p-matureseq  
cuccacugucucugucggcguc  
~~~~~  
>gis-dre-mir-130  
cgucuggcauuggguuugcagcaaacaaaugcauuggcggacucc  
>3p-matureseq  
aacaaaugcauuggcggacucc  
>5p-matureseq  
cgucuggcauuggguuugcagc  
~~~~~  
>gis-dre-mir-131  
cgugggauugagguagaagagaacugauuauaacucuccucacauacaaucccugccu  
>5p-matureseq  
cgugggauugagguagaaga  
>5p-matureseq  
cgugggauugagguagaagaga  
>3p-matureseq  
uccucacauacaaucccugccu  
~~~~~  
>gis-dre-mir-132  
cuacuggccuccauuacuccaguauugaugucucuggagacguggaggucgguggau  
>5p-matureseq  
cuacuggccuccauuacucca  
>3p-matureseq

ggagacguggaggucgguggau  
~~~~~  
>gis-dre-mir-133  
cuccacugucucugucggcgucucuucuuucucuccgcucgacggaguguguauuu  
>3p-matureseq  
cgucgacggaguguguauuu  
>5p-matureseq  
cuccacugucucugucggcguc  
~~~~~  
>gis-dre-mir-134  
cucgagcccagaguucccucccgugcaagguggggaggggaguuugagcucaggu  
>5p-matureseq  
cucgagcccagaguucccucccg  
>3p-matureseq  
ggaggggaguuugagcucaggu  
~~~~~  
>gis-dre-mir-135  
cucggaguagaucuuugagagaagucagcugagaugacucagagaucuguuucgaau  
>3p-matureseq  
acucagagaucuguuucgaau  
>5p-matureseq  
cucggaguagaucuuugagaga  
~~~~~  
>gis-dre-mir-136  
cucugacagaaucagcggagcggggagagagagcgcuccccgcaccgcugauucuauccguac  
>3p-matureseq  
caccgcugauucuauccguac  
>5p-matureseq  
cucugacagaaucagcggagc  
>5p-matureseq  
cucugacagaaucagcggagcg  
~~~~~  
>gis-dre-mir-137  
cucuuccuucuacgucauuaaaccgcgaggagaagcaccacaauugucgaaaguuuuaugauguacugaac  
ggaugccu  
>5p-matureseq  
cucuuccuucuacgucauuaaaccgcg  
>3p-matureseq  
uaaugauguacugaacggaugccu  
~~~~~  
>gis-dre-mir-138  
cugaagcaaaaacucgggccuggauagaguucaggaaggccagacugcauuguugacgcg  
>3p-matureseq  
aggccagacugcauuguugacgcg  
>5p-matureseq  
cugaagcaaaaacucgggccugg  
~~~~~  
>gis-dre-mir-139  
cugaagcccuugugaauugggcauuuaagguaaagcccaauucacacugggcuucagc  
>3p-matureseq  
ccaauucacacugggcuucagc  
>5p-matureseq  
cugaagcccuugugaauugggc  
~~~~~

>gis-dre-mir-140  
cugagccucggcugcaggucugauugcucuguaaacucuucaccaugcagccgagaccaaga  
>5p-matureseq  
cugagccucggcugcaggucuga  
>3p-matureseq  
ucaccaugcagccgagaccaaga  
~~~~~  
>gis-dre-mir-141  
cugaugaagucacucuaugacccgcgggcucugugucucgggauagguugauuucauugcau  
>5p-matureseq  
cugaugaagucacucuaugacc  
>5p-matureseq  
cugaugaagucacucuaugaccc  
>5p-matureseq  
cugaugaagucacucuaugacccg  
>3p-matureseq  
ggauagguugauuucauugcau  
~~~~~  
>gis-dre-mir-142  
cugccauccagcgcucugaaccugcggcuuucuggcgggcagagcgcagguggggcgaac  
>5p-matureseq  
cugccauccagcgcucugaaccu  
>3p-matureseq  
gcagagcgcagguggggcgaac  
~~~~~  
>gis-dre-mir-143  
cuggaacacaugcguuagcacagcaacacaugcuaaucgucaacagucuagu  
>3p-matureseq  
acaaugcuaaucgucaacagucuagu  
>5p-matureseq  
cuggaacacaugcguuagcacagca  
~~~~~  
>gis-dre-mir-144  
cuggagaucagcagaauggauucaguauugguaaaaccucaacuucagcugaucucugggu  
>3p-matureseq  
caacauucagcugaucucugggu  
>5p-matureseq  
cuggagaucagcagaauggauuc  
~~~~~  
>gis-dre-mir-145  
cuggagauccgcugaauugauucgauaaugguaaaacuuaacuucagcugaucucugggu  
>5p-matureseq  
cuggagauccgcugaauugauuc  
>3p-matureseq  
uaacauucagcugaucucugggu  
~~~~~  
>gis-dre-mir-146  
cugguuuugcuggucuaaggucuggucaugcugguuuaaauugcauugaccagcuagaccagcauuaaa  
accagcaagaccagcu  
>3p-matureseq  
auuaaaaccagcaagaccagcu  
>5p-matureseq  
cugguuuugcuggucuaagguc  
~~~~~

>gis-dre-mir-147  
cuguacgguucaguuugguauuuuaggccguuuccacugucaaaaagacauaccgaaccguacug  
uaccgua

>5p-matureseq  
cuguacgguucaguuugguauug  
>3p-matureseq  
uaccgaaccguacuguaccgua

~~~~~  
>gis-dre-mir-148  
cuguacgguucaguuugguauuuuccacugucaaaaaggcguaccaaaccgaaccguaucaua  
>5p-matureseq  
cuguacgguucaguuugguauug  
>3p-matureseq  
uaccaaaccgaaccguaucaua

~~~~~  
>gis-dre-mir-149  
cugugcuugagucaaaaguuuuacauccagcuaaggauaaagcaggggc  
>5p-matureseq  
cugugcuugagucaaaaguuu  
>3p-matureseq  
gcuaaggauaaagcaggggc

~~~~~  
>gis-dre-mir-150  
cuguggucagcguggucguugcagugugaagauauagccgacgacacuguucugauuggcugu  
>3p-matureseq  
acgacacuguucugauuggcugu  
>5p-matureseq  
cuguggucagcguggucgu

~~~~~  
>gis-dre-mir-151  
cuuacaauuaaaggauauuuucugagccgaaacuagcagaaauaucucuuaauuguuuuggu  
>3p-matureseq  
aaauaucucuuaauuguuuuggu  
>5p-matureseq  
cuuacaauuaaaggauauuuucu  
>5p-matureseq  
uuacaauuaaaggauauuuucu

~~~~~  
>gis-dre-mir-152  
cuucacucgucuguguucagcucuggaugaugugaugcugaacacggcccugagugagggga  
>5p-matureseq  
cuucacucgucuguguucagc  
>3p-matureseq  
ugaacacggcccugagugagggga

~~~~~  
>gis-dre-mir-153  
cuugggaugeaucuggcucguggaguacaaaguguuguggaagacuuaggugucagagggccauucau  
uccuuacc  
>3p-matureseq  
cagagggccauucauuccuuacc  
>5p-matureseq  
cuugggaugeaucuggcucgugga

~~~~~  
>gis-dre-mir-154

cuuguaaccaugaguucuauaguauuuguuguccuacuaugaaaaucacugguuacaggcu

>5p-matureseq

cuuguaaccaugaguucuaa

>3p-matureseq

ugaaaaucacugguuacaggcu

~~~~~

>gis-dre-mir-155

gaaaccaagcauggguguggccugaauccuccaauggcacccauccugguuucuga

>5p-matureseq

gaaaccaagcauggguguggcc

>5p-matureseq

gaaaccaagcauggguguggccu

>3p-matureseq

gcgacccauccugguuucuga

~~~~~

>gis-dre-mir-156

gaaagcugauuacugugacugcagugcacacuguaaaagcugcagucacaguaaucagcuuuu

>5p-matureseq

aaagcugauuacugugacugc

>5p-matureseq

gaaagcugauuacugugacugc

>3p-matureseq

gcagucacaguaaucagcuuuu

>3p-matureseq

ugcagucacaguaaucagcuuu

~~~~~

>gis-dre-mir-157

gaaagggugccgaaaaagugguacgguacgauuugguucgguacgccuuuuga

>5p-matureseq

gaaagggugccgaaaaagug

>3p-matureseq

uuugguucgguacgccuuuuga

~~~~~

>gis-dre-mir-158

gaaaguggacaaaagaaacacauucaaaugccuggugucaaccguaauggauucauuuguccacuug

uga

>5p-matureseq

gaaaguggacaaaagaaacaca

>3p-matureseq

ugauucauuuguccacuuguga

~~~~~

>gis-dre-mir-159

gaaaguggacaaaagaaacacauuuaaugcuagguuugaaugguaaugugugucuuuuguccacuug

uga

>5p-matureseq

gaaaguggacaaaagaaacaca

>3p-matureseq

ugugucuuuuguccacuuguga

~~~~~

>gis-dre-mir-160

gaaauuagcuauugacauaaaaaaaaucuacuauggauaucaguggcuaguucca

>5p-matureseq

gaaauuagcuauugacauaaa

>3p-matureseq

gauaucaguggcuaguuucca  
~~~~~  
>gis-dre-mir-161  
gaagcauccuuguccucugccccgaagcccagcccuaaggcagagcggccggaugugccu  
>5p-matureseq  
gaagcauccuuguccucugcccc  
>3p-matureseq  
uaaggcagagcggccggaugugccu  
~~~~~  
>gis-dre-mir-162  
gaagcauccuuguccucugccccggagcccagcccuaaggcagagcggccggaugugccu  
>5p-matureseq  
gaagcauccuuguccucugcccc  
>5p-matureseq  
gaagcauccuuguccucugccccgg  
>3p-matureseq  
uaaggcagagcggccggaugugccu  
~~~~~  
>gis-dre-mir-163  
gaagguagugagcugugccuuaaaacuggacuggguuccuuaauagagccgggagaaguguccgaggu  
gaugccacgccggacu  
>5p-matureseq  
gaagguagugagcugugccuuaaaac  
>3p-matureseq  
uccgaggugaugccacgccggacu  
~~~~~  
>gis-dre-mir-164  
gacaucugcacacugcuguguuauugauucagcacagaaguacacagacgucug  
>3p-matureseq  
cacagaaguacacagacgucug  
>5p-matureseq  
gacaucugcacacugcugugu  
~~~~~  
>gis-dre-mir-165  
gaccguccggcugcccgaacgaacaaacgaccgaccgggcccggccggaucgc  
>3p-matureseq  
accgggcccggccggaucgc  
>5p-matureseq  
gaccguccggcugcccgaacg  
~~~~~  
>gis-dre-mir-166  
gacucugcaugugugcuguguuuuuuagcccacacugcaaccauaugcaggauucugc  
>3p-matureseq  
cugcaaccuauaugcaggaucu  
>5p-matureseq  
gacucugcaugugugugcugugu  
>3p-matureseq  
ugcaaccuauaugcaggauucugc  
~~~~~  
>gis-dre-mir-167  
gagaagcagacaucagcacaggugaucaucauacagcacaggugcggugugugcuucacc  
>3p-matureseq  
caggugcggugugugcuucacc  
>5p-matureseq



gagaagcagacaucagcacaggu

~~~~~

>gis-dre-mir-168

gagaauaaugcacacaugagcaacuuaaccaacucaggugugcauuuuuccu

>3p-matureseq

acucaggugugcauuuuuccu

>5p-matureseq

gagaauaaugcacacaugagca

~~~~~

>gis-dre-mir-169

gagaaucaucagacuaggcaauguuuuuccaauaucugugucuaauuuuggugagccuguucug

>5p-matureseq

gagaaucaucagacuaggcaau

>3p-matureseq

ucuaauuuuggugagccuguucug

~~~~~

>gis-dre-mir-170

gaggcggguggcgcgguaguuguggggacgccgcucucuaauuucugccacccuagacgcggaua  
uaauug

>5p-matureseq

gaggcggguggcgcgguag

>3p-matureseq

gccacccuagacgcggauuaauug

~~~~~

>gis-dre-mir-171

gaguucugagguuuuuguauuugucaucauuaucauacgcaagugcaaauccaucagaucugu

>3p-matureseq

agugcaaauccaucagaucugu

>5p-matureseq

gaguucugagguuuuuguauuu

>5p-matureseq

gaguucugagguuuuuguauuuug

>5p-matureseq

gaguucugagguuuuuguauuuugu

~~~~~

>gis-dre-mir-172

gaugaggcugaaggccacugagcaugugcaguaagucuccugcagcuacucaucu

>5p-matureseq

gaugaggcugaaggccacu

>3p-matureseq

ucuccugcagcuacucaucu

~~~~~

>gis-dre-mir-173

gcacaauacaggcauuuggaugcuggcugcucucaaagcuucccaugcucguagaaugug

>5p-matureseq

gcacaauacaggcauuuggaug

>3p-matureseq

uucccaugcucguagaaugug

~~~~~

>gis-dre-mir-174

gcaccaucgacuuucauaguauuuuguuuuccuacuauugaagucgaugggugcca

>3p-matureseq

cuauugaagucgaugggugcca

>5p-matureseq

gcacccaucgacuuuauagua  
~~~~~  
>gis-dre-mir-175  
gcacucugugguuccaguggcgcauuguuaccuccccaugggccuggcgaucaacagggcgaga  
>5p-matureseq  
gcacucugugguuccaguggc  
>3p-matureseq  
ggccuggcgaucaacagggcgaga  
~~~~~  
>gis-dre-mir-176  
gcagacuucgacuugauugggucuuuugauugaggaggagaccaguggguaagucugaga  
>3p-matureseq  
ccaguggguaagucugaga  
>5p-matureseq  
gcagacuucgacuugauugggu  
~~~~~  
>gis-dre-mir-177  
gcaguagugucugauucugucauuuauaagcaugucugaauugauuuauugcau  
>5p-matureseq  
gcaguagugucugauucuguca  
>3p-matureseq  
ucugaaucugauguuuauugcau  
~~~~~  
>gis-dre-mir-178  
gccagcuccgggccgagcgcauuacucucgggcugauuccggcgcggaugcggcag  
>3p-matureseq  
auuccggcgcggaugcggcag  
>5p-matureseq  
gccagcuccgggccgagcgc  
~~~~~  
>gis-dre-mir-179  
gccagggaccucuagguggaggggcaauaggcccucuggggccagacugcaaguccaaggagaguuu  
ggccc  
>5p-matureseq  
gccagggaccucuagguggaggggcaaa  
>3p-matureseq  
ugcaaguccaaggagaguuuaggccc  
~~~~~  
>gis-dre-mir-180  
gccaucugacagguccaguucagugucacuguugaauuauagagcgguggaaaaaacguagauauac  
cagaucggcug  
>3p-matureseq  
aacguagauauaccagaucggcug  
>5p-matureseq  
gccaucugacagguccaguuca  
~~~~~  
>gis-dre-mir-181  
gccugccucucugugucucaaacacuucuaacugugucugagacacucagagggugg  
>5p-matureseq  
gccugccucucugugucucaaca  
>3p-matureseq  
ucugagacacucagagggugg  
~~~~~  
>gis-dre-mir-182

gcgucaaaaagcauuuuucagaaaaucccuguaaucgauuucugacaugucuuuugaugcca

>5p-matureseq

gcgucaaaaagcauuuuucagaaa

>3p-matureseq

ucugacaugucuuuugaugcca

~~~~~

>gis-dre-mir-183

gcgugauaacucuuuggcgacagagugucugcuucuguccaugguuguacgcuga

>5p-matureseq

gcgugauaacucuuuggcgacagagu

>3p-matureseq

uguccaugguuguacgcuga

~~~~~

>gis-dre-mir-184

gcguggaccggugggguuacauuaacaauuaccaauguaacgccgccgguccuacgcca

>5p-matureseq

cguuggaccggugggguuaca

>5p-matureseq

gcguggaccggugggguuaca

>3p-matureseq

uaacgccgccgguccuacgcc

>3p-matureseq

uaacgccgccgguccuacgcca

~~~~~

>gis-dre-mir-185

gcuaauguuagagaccaucugaaugcuguggcauauugguccaugauguuugcua

>5p-matureseq

gcuaauguuagagaccaucu

>3p-matureseq

uaugguccaugauguuugcua

~~~~~

>gis-dre-mir-186

gcuagugugaauaaggcauaagaauucgucuaacaaacgucgcuuucuaaccucauucacacuacga

>3p-matureseq

cuaaccucauucacacuacga

>5p-matureseq

gcuagugugaauaaggcauaag

~~~~~

>gis-dre-mir-187

gcugagacuugggccagacaugguccauguuuagucaaugucuggcaucaagacuuggucc

>5p-matureseq

gcugagacuugggccagaca

>3p-matureseq

ucuggcaucaagacuuggucc

~~~~~

>gis-dre-mir-188

gcugccacaugggccacaggaguguccauuccacgcccucgggacaucucggugggggaggagcua

uugugggauuauuggugucagacgg

>5p-matureseq

gcugccacaugggccacagg

>3p-matureseq

ugugggauuauuggugucagacgg

~~~~~

>gis-dre-mir-189

gcugcuggacuccggaugcuuguggacucacugcccgauuuccggccagaugcggcggccg

>5p-matureseq

gcugcuggacuccggaugcu

>3p-matureseq

uuuccggccagaugcggcggccg

~~~~~

>gis-dre-mir-190

gcuuuacaccauguuggaugcaguaaugguugcccauccaucuggauugaaaaguu

>3p-matureseq

auccaucuggauugaaaaguu

>5p-matureseq

gcuuuacaccauguuggaugc

~~~~~

>gis-dre-mir-191

ggaagaagaggcguuguuagugcugagaaaaagacaacaacaauuccucuucuuucuc

>3p-matureseq

acaacaauuccucuucuuucuc

>5p-matureseq

ggaagaagaggcguuguuagug

~~~~~

>gis-dre-mir-192

ggauagaaucagccgagcggggagcgcucucucucccguccgcugauucugucagu

>3p-matureseq

ccgcuccgcugauucugucagu

>5p-matureseq

ggauagaaucagccgagcggg

>5p-matureseq

ggauagaaucagccgagcgggg

~~~~~

>gis-dre-mir-193

ggauagaaucagccgagcggggagcgcucucucucccguccgcugauucugucaga

>3p-matureseq

ccgcuccgcugauucugucaga

>5p-matureseq

ggauagaaucagccgagcggg

>5p-matureseq

ggauagaaucagccgagcgggg

~~~~~

>gis-dre-mir-194

ggauagaaucagcggagcggggagcgcucucucucccguccgcugaaucugucagu

>3p-matureseq

ccgcuccgcugaaucugucagu

>5p-matureseq

ggauagaaucagcggagcgggg

~~~~~

>gis-dre-mir-195

ggauagaaucagcggagcggggagcgcucucucucccguccgcagauucugucagu

>3p-matureseq

ccgcuccgcagauucugucagu

>5p-matureseq

ggauagaaucagcggagcgggg

~~~~~

>gis-dre-mir-196

ggauagaaucagcggagcggggagcgcucucucucccucuccgcugauucuguca

>3p-matureseq  
cccucuccgcugauucuguca  
>5p-matureseq  
ggauagaaucagcggagcgggg  
~~~~~  
>gis-dre-mir-197  
ggauagaaucagcggagcggggagcgcucuucuccccgcucugcugauuuugucagu  
>3p-matureseq  
ccgcucugcugauuuugucagu  
>5p-matureseq  
ggauagaaucagcggagcgggg  
~~~~~  
>gis-dre-mir-198  
ggauagaaucagcugagcgggaaacgcucucucuccccgcuccgcugauucugucagu  
>3p-matureseq  
ccgcuccgcugauucugucagu  
>5p-matureseq  
ggauagaaucagcugagcggg  
>5p-matureseq  
ggauagaaucagcugagcggga  
~~~~~  
>gis-dre-mir-199  
ggcuaaaauacuuguagaagauggacagagagauuaucuacaagugauuuagcugu  
>5p-matureseq  
ggcuaaaauacuuguagaaga  
>3p-matureseq  
uucuacaagugauuuagcugu  
~~~~~  
>gis-dre-mir-200  
ggcucgcaggaaggccugcugcuugacgcuguuccucgugacuagagaggagaccuugccugcgggc  
uuu  
>3p-matureseq  
ggagaccuugccugcgggcuuu  
>5p-matureseq  
ggcucgcaggaaggccugcug  
~~~~~  
>gis-dre-mir-201  
gggagcaguguuaauuucgucaaugcaaaauagaauugagaaauugucauugcucauga  
>3p-matureseq  
gagaaauugucauugcucauga  
>5p-matureseq  
gggagcaguguuaauuucguca  
~~~~~  
>gis-dre-mir-202  
ggggagaacauguaaacucugcauagaaacgacauuuugugcaguuuacuuguucuuuucgu  
>3p-matureseq  
caguuuacuuguucuuuucgu  
>3p-matureseq  
gcaguuuacuuguucuuuucgu  
>5p-matureseq  
ggagaacauguaaacucugcau  
>5p-matureseq  
ggggagaacauguaaacucugca  
>5p-matureseq

ggggagaacauguaaacucugcaua  
>3p-matureseq  
ugcaguuuacuuguucuuuucgu  
~~~~~  
>gis-dre-mir-203  
gguaaccuugacuuccauaguuaagaaaaacaaauacuauugagaucaaugguugcagg  
>5p-matureseq  
gguaaccuugacuuccauagu  
>3p-matureseq  
uauugagaucaaugguugcagg  
~~~~~  
>gis-dre-mir-204  
gguagcacuguugcuuaggauagcaggguucuuuaaacgcuuccucucagcaacaacugccc  
>5p-matureseq  
gguagcacuguugcuuaggau  
>3p-matureseq  
uuccucucagcaacaacugccc  
~~~~~  
>gis-dre-mir-205  
ggugcaaaguuaaacgugcaugcuguguguguaugugcgugaacuuguagcga  
>5p-matureseq  
ggugcaaaguuaaacgugcaug  
>3p-matureseq  
ugugcgugaacuuguagcga  
~~~~~  
>gis-dre-mir-206  
ggugcagcagacuccucuccucucagauaucugugcuggagcugaggagcugaugcucugc  
>3p-matureseq  
agcugaggagcugaugcucugc  
>5p-matureseq  
ggugcagcagacuccucuccucu  
~~~~~  
>gis-dre-mir-207  
ggugcgcaacuucacggggacucucugaugcacgagaaagagcucguaaaguagcgcagggc  
>3p-matureseq  
gagcucguaaaguagcgcagggc  
>5p-matureseq  
ggugcgcaacuucacggggacu  
~~~~~  
>gis-dre-mir-208  
gguuugguacgcuuuuaggccguuuccacugucaaaaggccuaccgaaccaa  
>5p-matureseq  
gguuugguacgcuuuuaggcc  
>3p-matureseq  
ucaaaggccuaccgaaccaa  
~~~~~  
>gis-dre-mir-209  
guaaaagaacaagggaugccucaguuuuuuuuucaagcuaaagagcuuugaaaugaagaguuuuccu  
cguuccuuccacagg  
>5p-matureseq  
guaaaagaacaagggaugccu  
>3p-matureseq  
guuuuccucguuccuuccacagg  
~~~~~



>5p-matureseq  
gucacugguucgagcucggucc  
>3p-matureseq  
uucgagcucgguccauuggcau  
~~~~~  
>gis-dre-mir-218  
gucaucucugagcgggugugugucgcuucucucccgagacccgcagauggugaugg  
>3p-matureseq  
cagacccgcagauggugaugg  
>3p-matureseq  
gcagacccgcagauggugaugg  
>5p-matureseq  
gucaucucugagcgggugugug  
>5p-matureseq  
gucaucucugagcgggugugugu  
~~~~~  
>gis-dre-mir-219  
gucaugaugagcugauuacucaguugaacucucuugaggaucaucaucaucaagccugaucguug  
gcu  
>3p-matureseq  
caucaucagccugaucguuggcgu  
>5p-matureseq  
gucaugaugagcugauuacu  
>5p-matureseq  
gucaugaugagcugauuacuca  
>3p-matureseq  
ucaucagccugaucguuggcgu  
~~~~~  
>gis-dre-mir-220  
gucgguggcgccggguuggcggcccugguggugccggugugccaccgcccgaagucgccugcggagg  
>3p-matureseq  
caccgcccgaagucgccugcggagg  
>5p-matureseq  
gucgguggcgccggguuggcggcc  
~~~~~  
>gis-dre-mir-221  
gucuccguguaucuguguuugcacugggugaagagcaguaagcugagugcaaacuaaacacagagaca  
cggauacug  
>3p-matureseq  
aacacagagacacggauacug  
>5p-matureseq  
gucuccguguaucuguguuug  
~~~~~  
>gis-dre-mir-222  
gucuccgugugucuguguuugcacugggugaagagcaguaagcugagugcaaacaaacacagagaca  
cggauacug  
>3p-matureseq  
aacacagagacacggauacug  
>5p-matureseq  
gucuccgugugucuguguuug  
~~~~~  
>gis-dre-mir-223  
gucuggaccccagugacuucaguggaauuacuugaaagucaugguguccgaacua  
>3p-matureseq



aaagucaaugguguccgaacua  
>5p-matureseq  
gucuggaccccagugacuuuca  
>5p-matureseq  
gucuggaccccagugacuuucag  
~~~~~  
>gis-dre-mir-224  
gucuugcgcugugcacuugaccuuuugaccucuaaggucgugaccucgcugcaugacugc  
>5p-matureseq  
gucuugcgcugugcacuugaccu  
>3p-matureseq  
ucgugaccucgcugcaugacugc  
~~~~~  
>gis-dre-mir-225  
gugaguguccugagugggaaacgggacagagaaacuguucugcuaacguccugcucagaacaacaug  
c  
>3p-matureseq  
aacguccugcucagaacaacaugc  
>5p-matureseq  
gugaguguccugagugggaaacggg  
~~~~~  
>gis-dre-mir-226  
gugagugucuccuuggcauuuauucgcuugaguuuuuaaaugaccuucguuuuuuuuauugccaugu  
ugcauucacagg  
>3p-matureseq  
aaugccauguugcauucacagg  
>5p-matureseq  
gugagugucuccuuggcauuua  
~~~~~  
>gis-dre-mir-227  
gugccuaggaacuguaugaauGCCuaaaugauugcuauuuuauacauugccuaggcguucu  
>5p-matureseq  
gugccuaggaacuguaugaau  
>3p-matureseq  
uuauacauugccuaggcguucu  
~~~~~  
>gis-dre-mir-228  
guggauguaaacgguucuucaugagaaauucaaaagguuccaugaagaacuuaaacaaccaac  
>5p-matureseq  
guggauguaaacgguucuucaug  
>3p-matureseq  
ugaagaacuuaaacaaccaac  
~~~~~  
>gis-dre-mir-229  
guguaacguuucaugcacaccggccuuccucagacugugcucgaaauguugcaug  
>3p-matureseq  
gacugugcucgaaauguugcaug  
>5p-matureseq  
guguaacguuucaugcacaccggcc  
~~~~~  
>gis-dre-mir-230  
guugagacuuuccaccugacuaauuagugcuuuuuuauucgaugcuggauuucucaaccu  
>3p-matureseq  
aucgaugcuggauuucucaaccu

>5p-matureseq  
guugagacuuuccaccugacu  
>3p-matureseq  
ucgaugcuggauuucucaaccu  
~~~~~  
>gis-dre-mir-231  
guuggacaaaagcagcuguaguaggagcaaaaauacuauggcagauuuuuccagcau  
>5p-matureseq  
guuggacaaaagcagcuguagu  
>3p-matureseq  
uauggcagauuuuuccagcau  
~~~~~  
>gis-dre-mir-232  
uaaaguaacuugagaaccccagugggaaaccccacacacuucucaguuuagcauuau  
>3p-matureseq  
acacacuucucaguuuagcauuau  
>5p-matureseq  
uaaaguaacuugagaaccccagugg  
~~~~~  
>gis-dre-mir-233  
uaaccauugaccuccauaguauuuguuuauugcuacuauugagaucaaugguuaag  
>5p-matureseq  
uaaccauugaccuccauagu  
>3p-matureseq  
uauugagaucaaugguuaag  
~~~~~  
>gis-dre-mir-234  
uaaccuggccggaauugcuaagccaauaagccccaagcgucuggcuagacucugggccgggagaga  
>3p-matureseq  
cuagacucugggccgggagaga  
>5p-matureseq  
uaaccuggccggaauugcuaagcc  
~~~~~  
>gis-dre-mir-235  
uaagcacagcuaauuuagaguuuugcaccucaguacucuagauuuaguuguucuugga  
>5p-matureseq  
uaagcacagcuaauuuagagu  
>3p-matureseq  
ucuagauuuaguuguucuugga  
~~~~~  
>gis-dre-mir-236  
uaaugcuaagaaagucuuuuuaaguccuaagugcugugcaggcaaggugaugguacgggaacaugca  
ugugc  
>5p-matureseq  
uaaugcuaagaaagucuuuuuaaguc  
>3p-matureseq  
ugaugguacgggaacaugcugugc  
~~~~~  
>gis-dre-mir-237  
uaaugggcugacaaaacagauagagauuuagcgcucacuggcugugcugaauuuuaacuuggaug  
aucuggcucgcugga  
>3p-matureseq  
cuugggaugaucuggcucgcugga  
>5p-matureseq

uaaugggcugacaaaacagua  
~~~~~  
>gis-dre-mir-238  
uaauuuccacauugggucauuucugaacaugacuguuuacauggacaucaguaauggaauuuuugg  
>5p-matureseq  
uaauuuccacauugggucauuucug  
>3p-matureseq  
uacauggacaucaguaauggaauuuuugg  
~~~~~  
>gis-dre-mir-239  
uacacuggguuuagauuuucugagguaaaauagaccagauuauaccagacacauua  
>5p-matureseq  
uacacuggguuuagauuuucugag  
>3p-matureseq  
uuagaccagauuauaccagacacauua  
~~~~~  
>gis-dre-mir-240  
uacaugaacagucuugacagagccacaggagucaccugcugaaaggagggaugcagacugcucaacgu  
caaaaggaggauuauuggcu  
>3p-matureseq  
caacgucaaaaggaggauuauuggcu  
>5p-matureseq  
uacaugaacagucuugacagagccaca  
~~~~~  
>gis-dre-mir-241  
uacauucauugaugucguuggguuucacaugugagcgacucacugaccaaugagugcaaa  
>5p-matureseq  
uacauucauugaugucguugggu  
>3p-matureseq  
ucacugaccaaugagugcaaa  
~~~~~  
>gis-dre-mir-242  
uacgguuugguaagcuuuuauuggcuguuuccacugucaaaaggccuaccgaaccaaac  
>3p-matureseq  
caaaaggccuaccgaaccaaac  
>5p-matureseq  
uacgguuugguaagcuuuuauugg  
>3p-matureseq  
ucaaaaggccuaccgaacca  
~~~~~  
>gis-dre-mir-243  
uacucaggaucgcuggucagcagugccucaaaggccuuuaccacuuuuugucuggcuugagcauccu  
gcucagucuccuguuccgu  
>5p-matureseq  
uacucaggaucgcuggucagcagug  
>3p-matureseq  
ucccugcucagucuccuguuccgu  
~~~~~  
>gis-dre-mir-244  
uacuccaagucuguaaccuuugcaaaucacagaggucccgauuguaaguuuuu  
>5p-matureseq  
uacuccaagucuguaaccuuugcaaaucac  
>3p-matureseq  
ucagaggucccgauuguaaguuuuu

~~~~~  
>gis-dre-mir-245  
uagaguguaucaugucuacguauguaaugaauauguguagacaugauacacucuaua  
>5p-matureseq  
uagaguguaucaugucuacgua  
>3p-matureseq  
uguagacaugauacacucuaua  
~~~~~  
>gis-dre-mir-246  
uaggaaauaauugcacaccugaguugguuaaguugcucaugugugcauuauucuccaau  
>5p-matureseq  
uaggaaauaauugcacaccugagu  
>3p-matureseq  
ucaugugugcauuauucuccaau  
~~~~~  
>gis-dre-mir-247  
uaggaggcacuagagggcaguagagagcgcgugucgucaucugcgucucugguacuuccuccugga  
>3p-matureseq  
gcgucucugguacuuccuccugga  
>5p-matureseq  
uaggaggcacuagagggcaguag  
~~~~~  
>gis-dre-mir-248  
uagguuugguauugcuuuuauuggccguuuccacugucaaaaguguaccgaaccaaac  
>3p-matureseq  
caaaaguguaccgaaccaaac  
>5p-matureseq  
uagguuugguauugcuuuuauuggc  
>5p-matureseq  
uagguuugguauugcuuuuauuggcc  
>3p-matureseq  
ucaaaaguguaccgaaccaaac  
~~~~~  
>gis-dre-mir-249  
uaguauuucagcuccaggacugcccacuuuauugccagggccucuucucaauggcugcguacuugga  
uuccgcuguggugagcuuc  
>3p-matureseq  
cguacuuggauuccgcuguggugagcuuc  
>5p-matureseq  
uaguauuucagcuccaggacugccc  
~~~~~  
>gis-dre-mir-250  
uagucacauaugagugaguucuuuggucacauuggauuuauuaaacuccuugaanguugacugga  
>3p-matureseq  
acuccuugaanguugacugga  
>5p-matureseq  
uagucacauaugagugaguuc  
~~~~~  
>gis-dre-mir-251  
uagucuuguugguaccugguggugauuguuuacccgugguauucgucguagcuagc  
>3p-matureseq  
acccgugguauucgucguagcuagc  
>5p-matureseq  
uagucuuguugguaccugguggugauuguu

~~~~~  
>gis-dre-mir-252  
uauaucagcuuugguggaggcuugcguuagugucccaccagugcugauauaca  
>5p-matureseq  
uauaucagcuuugguggaggcu  
>3p-matureseq  
ugucccaccagugcugauauaca  
~~~~~  
>gis-dre-mir-253  
uauucugauaaaauauauaccugcaaguugaccuuuaaaauggucuuuaacugucucuguuugaaga  
auauu  
>5p-matureseq  
uauucugauaaaauauauaccugcaagu  
>3p-matureseq  
uguacucuguuugaagaauauu  
~~~~~  
>gis-dre-mir-254  
uaugaagucugcagcuguauccauauaugggucacggguccaguguaagcuucaug  
>3p-matureseq  
guccacguguaagcuucaug  
>5p-matureseq  
uaugaagucugcagcuguauc  
~~~~~  
>gis-dre-mir-255  
uauugacgcgauuccuuucguaggugacaucuaauguauaaaucuaugauagaggauagcguuuaacca  
uu  
>3p-matureseq  
aucuaugauagaggauagcguuuaaccauu  
>5p-matureseq  
uauugacgcgauuccuuucguaggug  
~~~~~  
>gis-dre-mir-256  
ucaagugucugucagcaccaggcaggaagcaagaccucggugcgcagaaacacagcgg  
>5p-matureseq  
ucaagugucugucagcaccag  
>5p-matureseq  
ucaagugucugucagcaccagg  
>3p-matureseq  
uggugcgcagaaacacagcgg  
~~~~~  
>gis-dre-mir-257  
ucaauaacauuuugggcucaugaagguauuuaaaauagcgcaaauguuguugauu  
>3p-matureseq  
uaagcgcaaauguuguugauu  
>5p-matureseq  
ucaauaacauuuugggcucaug  
~~~~~  
>gis-dre-mir-258  
ucacaauguagaucuaugauauguacagagcaacaaguagaauagccagugugagguc  
>3p-matureseq  
acaaguagaauagccagugugagguc  
>5p-matureseq  
ucacaauguagaucuaugauaugu  
~~~~~

>gis-dre-mir-259  
ucaccagucgcucucauuucuaauuuuuuuuguccauacaugaagcgaauggugacu  
>3p-matureseq  
acaugaagcgaauggugacu  
>5p-matureseq  
ucaccagucgcucucauuucua  
~~~~~  
>gis-dre-mir-260  
ucacucauuuacugcuauaguaagaaaaguaaaauacuauugggaguaaaauaggugaga  
>3p-matureseq  
cuauaggaguaaaauaggugaga  
>5p-matureseq  
ucacucauuuacugcuauagu  
~~~~~  
>gis-dre-mir-261  
ucagcugaucugucagugaauuggcuuguauaucuacucauagacagauccucugaug  
>3p-matureseq  
cucauagacagauccucugaug  
>5p-matureseq  
ucagcugaucugucagugaau  
~~~~~  
>gis-dre-mir-262  
ucaggaaucauggggguuggaccgcgguauugguccuuguucagguggaggugauggag  
>5p-matureseq  
ucaggaaucauggggguuggaccg  
>3p-matureseq  
uccuuguucagguggaggugauggag  
~~~~~  
>gis-dre-mir-263  
ucaggagucaggauuagacgggcugcuugauuuugaucggguuugaucuccugauguccuucac  
>3p-matureseq  
gguuugaucuccugauguccuucac  
>5p-matureseq  
ucaggagucaggauuagacggg  
~~~~~  
>gis-dre-mir-264  
ucaggcacugucagguucggaccuuuacuguaucgcccagccuucucucugccugccu  
>3p-matureseq  
ccagccuucucucugccugccu  
>5p-matureseq  
ucaggcacugucagguucggac  
~~~~~  
>gis-dre-mir-265  
ucagugaauucucauuggcucuuuuccggccuagcaauaagcagccaauagagauuuuauucugag  
>3p-matureseq  
cagccaauagagauuuuauucugag  
>5p-matureseq  
ucagugaauucucauuggcucu  
~~~~~  
>gis-dre-mir-266  
ucagugcagugguucagcugaaaucaagcauuacauuacagcugaaccacugcacugugu  
>3p-matureseq  
cagcugaaccacugcacugugu  
>5p-matureseq

ucagugcagugguucagcuga  
~~~~~  
>gis-dre-mir-267  
ucaguuugguacgauuuuaaggccguuuccacugucaauaagcguacugaaccaa  
>3p-matureseq  
ucaauaagcguacugaaccaa  
>5p-matureseq  
ucaguuugguacgauuuuaaggc  
~~~~~  
>gis-dre-mir-268  
ucaguuugguacgcuuuuaugaccguuuccaacuaucaaaaaggcguaccaaaccaa  
>3p-matureseq  
ucaaaaaggcguaccaaaccaa  
>5p-matureseq  
ucaguuugguacgcuuuuaugac  
~~~~~  
>gis-dre-mir-269  
ucauggcccugaugucuucggaaugaagcuuggugacuuggucaucuugaaaugucuuggccgucg  
ug  
>5p-matureseq  
ucauggcccugaugucuucggaauga  
>3p-matureseq  
ucuugaaaugucuuggccgucgug  
~~~~~  
>gis-dre-mir-270  
ucaugucagacgagggccguaauaucugcuagaaacucugacccagaucugacugacu  
>5p-matureseq  
ucaugucagacgagggccguaau  
>3p-matureseq  
ucugacccagaucugacugacu  
~~~~~  
>gis-dre-mir-271  
ucauguccgaggauaauaucucuugcagaggaugacgcccuccuugccaaggcuccucugagaucuccu  
gccggcaccca  
>5p-matureseq  
ucauguccgaggauaauaucucuugcagag  
>3p-matureseq  
ucugagaucuccugccggcaccca  
~~~~~  
>gis-dre-mir-272  
uccagaacguucuugccuguguggacauuuugaauucaccgguaaagucguucuggaa  
>3p-matureseq  
caccgguaaagucguucuggaa  
>5p-matureseq  
uccagaacguucuugccugugugg  
~~~~~  
>gis-dre-mir-273  
uccaucauccucugcgucagcacugucucugcucauguguucaugagaggcuguggaggu  
>3p-matureseq  
guucaugagaggcuguggagg  
>3p-matureseq  
guucaugagaggcuguggaggu  
>5p-matureseq  
uccaucauccucugcgucagca

>5p-matureseq  
uccaucauccucugcgucagcac  
~~~~~  
>gis-dre-mir-274  
uccaucuauuuggucuguucugagcgacucuccagcccaggccagauggaggagc  
>3p-matureseq  
gccagggccagauggaggagc  
>5p-matureseq  
uccaucuauuuggucuguucug  
~~~~~  
>gis-dre-mir-275  
uccuggugcagcuucaccacugggcucaguggaucuucuggugcagcuccaccucuggg  
>5p-matureseq  
uccuggugcagcuucaccacugg  
>3p-matureseq  
ucuggugcagcuccaccucuggg  
~~~~~  
>gis-dre-mir-276  
ucgaaugccuacuccuaguccacaaaaacacauguggacugguugggcuaacuucc  
>3p-matureseq  
acugguugggcuaacuucc  
>5p-matureseq  
ucgaaugccuacuccuagucc  
~~~~~  
>gis-dre-mir-277  
ucggaauugguaugcauuuauuguccuuuuccacugucaaaagguaccuaaaaagcuaaccauucugug  
>3p-matureseq  
ccuaaaaagcuaaccauucugug  
>5p-matureseq  
ucggaauugguaugcauuuauugu  
~~~~~  
>gis-dre-mir-278  
ucggcaggcucugcuaucagcacaggcucuuuuguauugaagugcugauaguguaucugucgga  
>5p-matureseq  
ucggcaggcucugcuaucagcac  
>5p-matureseq  
ucggcaggcucugcuaucagcaca  
>3p-matureseq  
ugcugauaguguaucugucgga  
~~~~~  
>gis-dre-mir-279  
ucgguucgguacgcuuuuauuggccguuuccacugucaauaagcguacugaacaaa  
>3p-matureseq  
ucaauaagcguacugaacaaa  
>5p-matureseq  
ucgguucgguacgcuuuuauuggc  
~~~~~  
>gis-dre-mir-280  
ucgucgacacccaucagauauuagcaugccaaauaucugacgggugucggugacu  
>3p-matureseq  
uauucugacgggugucggugacu  
>5p-matureseq  
ucgucgacacccaucagauuu  
~~~~~



>gis-dre-mir-281  
ucuaggcuggucaagugaccauguugcuuuaaagugauuuauggcacuugucagccuggaaa

>5p-matureseq  
ucuaggcuggucaagugaccaug  
>3p-matureseq  
uggcacuugucagccuggaaa

~~~~~

>gis-dre-mir-282  
ucuccagcagagagaucuccugaggcccgugcacaccaggauacuucugcugacguuu

>3p-matureseq  
aggauacuucugcugacguuu  
>5p-matureseq  
ucuccagcagagagaucuccuga

~~~~~

>gis-dre-mir-283  
ucuccauaucugugggcgcacaaugcuuuccugcauagggguuccuguagauacggagacu

>3p-matureseq  
gguccuguagauacggagacu  
>5p-matureseq  
ucuccauaucugugggcgcaca

~~~~~

>gis-dre-mir-284  
ucugaaagcauagugccauggaccuuucuggagaccuugaauuauguauccggagu

>3p-matureseq  
accuugaauuauguauccggagu  
>5p-matureseq  
ucugaaagcauagugccauggacc

~~~~~

>gis-dre-mir-285  
ucugaaucugauguuuauugcauuagcaugccugauuuagccugucugauuuugaugugcuaauagaau  
gucugauuuuaca

>3p-matureseq  
aauagaaugucugauuuuaca  
>5p-matureseq  
ucugaaucugauguuuauugcau

~~~~~

>gis-dre-mir-286  
ucugaauuuuuagguggaguugacuucacuagccccgccucugaauucaauagg

>3p-matureseq  
ccccgccucugaauucaauagg  
>5p-matureseq  
ucugaauuuuuagguggagu

~~~~~

>gis-dre-mir-287  
ucugacaacagggugaauagaaguaaaauaguuuucccugugagagauuauucacucacccugg  
ugucagauu

>3p-matureseq  
acucacccuggugucagauu  
>5p-matureseq  
ucugacaacagggugaauaga

~~~~~

>gis-dre-mir-288  
ucugacaugucuuuugaugccaanguuuaaangucauuuugacaucuuuuggcaucaaggaaguuuac  
au

>3p-matureseq  
gcAUcaaggaaguuuacau  
>5p-matureseq  
ucUGacaugucuuuugaugcca  
~~~~~  
>gis-dre-mir-289  
ucUGaccguugacuucuauguugcaaguuugauacuacggaggucagugguuagag  
>3p-matureseq  
uacggaggucagugguuagag  
>5p-matureseq  
ucUGaccguugacuucuaugu  
~~~~~  
>gis-dre-mir-290  
ucUGaggcgucaucguguuucuggaucuccaugcagaaaaccaggauccccagagc  
>3p-matureseq  
aaaccaggauccccagagc  
>5p-matureseq  
ucUGaggcgucaucguguuucu  
~~~~~  
>gis-dre-mir-291  
ucUGauaguauugugcucugggccuguaaaaaacaaagagcuuaaagcaagcuucaacagaaaaccagg  
uaauaauuuauugcga  
>3p-matureseq  
aaaccagguauaauaauuuauugcga  
>5p-matureseq  
ucUGauaguauugugcucugggccu  
~~~~~  
>gis-dre-mir-292  
ucUGcccuaggguguccuggugucaugugcacugauggauaccuuauugcucgaaca  
>5p-matureseq  
ucUGcccuaggguguccuggug  
>3p-matureseq  
ugauggauaccuuauugcucgaaca  
~~~~~  
>gis-dre-mir-293  
ucUGcuuaacgaaccuauagacgccagugguuucucggguucguuaagcaauga  
>3p-matureseq  
ucucggguucguuaagcaauga  
>5p-matureseq  
ucUGcuuaacgaaccuauagacg  
~~~~~  
>gis-dre-mir-294  
ucUGgcaccaacugacuuccguaguagaaauacuauaggaggucuuuaggugccagaaa  
>3p-matureseq  
ggaggucuuuaggugccagaaa  
>5p-matureseq  
ucUGgcaccaacugacuuccgu  
~~~~~  
>gis-dre-mir-295  
ucUGuacaagauuccauuaagcacugaaaguugucccacugcuuaaggauccguaacacauacaggug  
gu  
>3p-matureseq  
cugcuuaaggauccguaacacauacaggugu  
>5p-matureseq

ucuguacaagauuccauuaagcacu  
~~~~~  
>gis-dre-mir-296  
ucugugauuuuggugaugugaacugaauuuacuucacuucaccagcauuacaauaa  
>3p-matureseq  
cacuucaccagcauuacaauaa  
>5p-matureseq  
ucugugauuuuggugaugugaa  
~~~~~  
>gis-dre-mir-297  
ucuuacuguugcucaauggaguuggacaaugaagaaccgacaagaacugaacggcuugugagggc  
>3p-matureseq  
caagaacugaacggcuugugagggc  
>5p-matureseq  
ucuuacuguugcucaauggaguu  
~~~~~  
>gis-dre-mir-298  
ucuugaacgccggaaaacagaggaaugcccguuucucaucuguucuccggcgucgagcau  
>3p-matureseq  
ucuguucuccggcgucgagcau  
>5p-matureseq  
ucuugaacgccggaaaacaga  
>5p-matureseq  
ucuugaacgccggaaaacagag  
~~~~~  
>gis-dre-mir-299  
ugaaccagcgggccuaucuccugaugcaucuggaauaaugggucaugaagugg  
>3p-matureseq  
ucuggaauaaugggucaugaagugg  
>5p-matureseq  
ugaaccagcgggccuaucucc  
~~~~~  
>gis-dre-mir-300  
ugaacgugguacagaggagucuaacgcggguccagagaugagugaggauacuguaaccguucugg  
>3p-matureseq  
gugaggauacuguaaccguucugg  
>5p-matureseq  
ugaacgugguacagaggagucuaacgc  
~~~~~  
>gis-dre-mir-301  
ugacacccaaucaacuucuaugaaggggaaaauuacuauggaagucaauugggcucagu  
>3p-matureseq  
auggaagucaauugggcucagu  
>5p-matureseq  
ugacacccaaucaacuucuaug  
~~~~~  
>gis-dre-mir-302  
ugacucaacucugauuggucagauggcucuacucauucugauuggucaguugagucugcuc  
>5p-matureseq  
ugacucaacucugauuggucaga  
>3p-matureseq  
ugauuggucaguugagucugcuc  
~~~~~  
>gis-dre-mir-303

ugacuugaaagggacuugcuagaccaagcuacgacuugacgugacuugaaauaagcagugacuucgcu  
ugagucug  
>3p-matureseq  
auaagcagugacuucgcuugagucug  
>5p-matureseq  
ugacuugaaagggacuugcuagacc  
~~~~~  
>gis-dre-mir-304  
ugagagaaaagucuauggcuuggguggcuggagucgcugaugauucucuuggc  
>3p-matureseq  
agucgcugaugauucucuuggc  
>5p-matureseq  
ugagagaaaagucuauggcuug  
~~~~~  
>gis-dre-mir-305  
ugagagaugcgacgacguguugggagcccuauggaggaucuauccacccguccaucuucugg  
>3p-matureseq  
ucuauccacccguccaucuucugg  
>5p-matureseq  
ugagagaugcgacgacguguugggagc  
~~~~~  
>gis-dre-mir-306  
ugaggcggucauagcaugagguaaaacgagcagagcuuguucgcucagccguguccgccucaccu  
>3p-matureseq  
ucagccguguccgccucaccu  
>5p-matureseq  
ugaggcggucauagcaugaggu  
~~~~~  
>gis-dre-mir-307  
ugaguagcaaugcgauguggcuguagcguccaccagugaugucacaucgcacugcuucucgug  
>3p-matureseq  
ucacaucgcacugcuucucgug  
>5p-matureseq  
ugaguagcaaugcgauguggcu  
>5p-matureseq  
ugaguagcaaugcgauguggcug  
~~~~~  
>gis-dre-mir-308  
ugaguccuguuuuagcagaguuuuuuaucauuugagcuuugcugugacuggaucuga  
>3p-matureseq  
gcuuugcugugacuggaucuga  
>5p-matureseq  
ugaguccuguuuuagcagaguuu  
~~~~~  
>gis-dre-mir-309  
ugagucuuguacagggaaauaguguucugauccaagggacuggauuggaaauaucacuguuccucugc  
auaagauuc  
>3p-matureseq  
cuguuccucugcauaagauuc  
>5p-matureseq  
ugagucuuguacagggaaugu  
~~~~~  
>gis-dre-mir-310  
ugaugacacccauugacuuccaucguuuuucuuucuguagacaucgauggguagcaucca

>3p-matureseq  
agacaucgauggguagcaucca  
>5p-matureseq  
ugaugacacccauugacuuccaucguuu  
~~~~~  
>gis-dre-mir-311  
ugauuggucaaauaggucuacauugauugaucaaaugacuacuugcuaugauuggucuggcgacucu  
gcuaggauugaucaga  
>3p-matureseq  
cgacucugcuaggauugaucaga  
>3p-matureseq  
gcgacucugcuaggauugaucaga  
>5p-matureseq  
ugauuggucaaauaggucuac  
>5p-matureseq  
ugauuggucaaauaggucuaca  
~~~~~  
>gis-dre-mir-312  
ugauuggucaaauaggucuacauugauugaucaaaugacuacuugcuaugauuggucuggcgacucu  
gcuauugauuggucaga  
>3p-matureseq  
cgacucugcuauugauuggucaga  
>3p-matureseq  
gcgacucugcuauugauuggucaga  
>5p-matureseq  
ugauuggucaaauaggucuac  
>5p-matureseq  
ugauuggucaaauaggucuaca  
~~~~~  
>gis-dre-mir-313  
ugcaaguccaaggagaguuuggccccucaguagcuugcuggguucaggguaaucuuauuguggggggca  
ag  
>3p-matureseq  
guaaucuuauuguggggggcaag  
>5p-matureseq  
ugcaaguccaaggagaguuuggccc  
~~~~~  
>gis-dre-mir-314  
ugcacuuugaaccgcucuauggcacaccucuccaaccgggccaggaccggauaaagugagcc  
>3p-matureseq  
caggaccggauaaagugagcc  
>5p-matureseq  
ugcacuuugaaccgcucuauggc  
~~~~~  
>gis-dre-mir-315  
ugcagcccuugaguuucauaguugaguuccgaaaaauacuauuggaagucagggguuaccuu  
>3p-matureseq  
uauggaagucagggguuaccuu  
>5p-matureseq  
ugcagcccuugaguuucauagu  
~~~~~  
>gis-dre-mir-316  
ugcauccgcgcagaaacacugaaggucaugauagcguguaucugcugcagauaggau  
>5p-matureseq

ugcauccgcgcagaaacacug  
>3p-matureseq  
uguaucugcugcagaugaggau  
~~~~~  
>gis-dre-mir-317  
ugcauugcucuacuugaaguuuuguacugucagaaacucaagcaaagcagcgagg  
>3p-matureseq  
acuucaagcaaagcagcgagg  
>5p-matureseq  
ugcauugcucuacuugaaguuu  
~~~~~  
>gis-dre-mir-318  
ugcgagccugugguguguaguauugcagaaauugcgcacuacacaccacggacuuugcacu  
>3p-matureseq  
uacacaccacggacuuugcacu  
>5p-matureseq  
ugcgagccugugguguguagu  
~~~~~  
>gis-dre-mir-319  
ugcguccugauugugaugacgggauauaaaauuggcccacaauucauucacaaugaugacgucgu  
>3p-matureseq  
aucuucacaaugaugacgucgu  
>5p-matureseq  
ugcguccugauugugaugacgg  
~~~~~  
>gis-dre-mir-320  
ugcguuugaaagucgagcuuggcaauaccaagucccccuucgggcgucucu  
>3p-matureseq  
caagucccccuucgggcgucucu  
>5p-matureseq  
ugcguuugaaagucgagcuuggc  
~~~~~  
>gis-dre-mir-321  
ugcucaggcccguuucucagaucguuugagaagugugagcgucucugaaucaggcucaggcacg  
>3p-matureseq  
cucugaaucaggcucaggcacg  
>3p-matureseq  
ugaaucaggcucaggcacg  
>5p-matureseq  
ugcucaggcccguuucucaga  
>5p-matureseq  
ugcucaggcccguuucucagaucg  
~~~~~  
>gis-dre-mir-322  
ugcuguuugguuugguauuggccuuuccacugucaaaaaggcauaccgaaccuuaccguacc  
>3p-matureseq  
ggcauaccgaaccuuaccguacc  
>5p-matureseq  
ugcuguuugguuugguauuggccc  
~~~~~  
>gis-dre-mir-323  
ugcuugagaacgagggcucggcgucugcuugagggcgaaggcucgccggcgucguugagggcgaa  
ggcucg  
>3p-matureseq

cggcgcuugagggcgaaggcucg  
>3p-matureseq  
ggcgcuugagggcgaaggcucg  
>5p-matureseq  
ugcuugagaacgagggcucgccgg  
>5p-matureseq  
ugcuugagaacgagggcucgccggc  
~~~~~  
>gis-dre-mir-324  
uggaucuacauugguuagagcacucuacugugauuggucuuuugacuugcucugcucugauugguca  
aauaggucuaca  
>5p-matureseq  
ggaucuacauugguuaga  
>3p-matureseq  
ugauuggucaaaauaggucuac  
>3p-matureseq  
ugauuggucaaaauaggucuaca  
>5p-matureseq  
uggaucuacauugguuaga  
~~~~~  
>gis-dre-mir-325  
uggcagccauugacuuccauuguaggacaacaaaauaugauggaaaucaauggaucucagu  
>3p-matureseq  
gauggaaaucaauggaucucagu  
>5p-matureseq  
uggcagccauugacuuccauugu  
~~~~~  
>gis-dre-mir-326  
uggcauucugcugaaguucagaguuucuuuauacaagaaacucugaacuucagcagaaugcca  
>3p-matureseq  
ucugaacuucagcagaaugcca  
>5p-matureseq  
uggcauucugcugaaguucaga  
~~~~~  
>gis-dre-mir-327  
uggcauuuggaggcacgagaccaguuugugagugaggucugugccccaaaagacacu  
>3p-matureseq  
ucucgugccccaaaagacacu  
>5p-matureseq  
uggcauuuggaggcacgagacc  
~~~~~  
>gis-dre-mir-328  
uggcccagauguuaauaauugauaugugggccagauguaaaauguaguauuuggcccagauguuaauu  
auugauaugugggccaga  
>3p-matureseq  
aaauaauugauaugugggccaga  
>5p-matureseq  
uggcccagauguuaauaauuga  
~~~~~  
>gis-dre-mir-329  
ugggggcaggggaaguugaaguuggugaugguauacucuccuucacuucugcccucauc  
>3p-matureseq  
uccuucacuucugcccucauc  
>5p-matureseq

ugggggcaggggaaguugaaguugg  
~~~~~  
>gis-dre-mir-330  
uguaaucuuugaccuccguaguguuuuuuuuccuacuacagagggcaaugguuacaga  
>3p-matureseq  
uacagagggcaaugguuacaga  
>5p-matureseq  
uguaaucuuugaccuccguagu  
~~~~~  
>gis-dre-mir-331  
uguagcacugugauacuggcuguauaucgauacaguauauaggcauaucgcacugcuaugagu  
>3p-matureseq  
aggcauaucgcacugcuaugagu  
>3p-matureseq  
uaggcauaucgcacugcuauga  
>5p-matureseq  
uguagcacugugauacuggcugu  
~~~~~  
>gis-dre-mir-332  
uguagcuauugacucccauaguguuuuuuuugccuacuauuggaaguucguuguuacaggu  
>3p-matureseq  
auggaaguucguuguuacaggu  
>5p-matureseq  
uguagcuauugacucccauagu  
~~~~~  
>gis-dre-mir-333  
uguagcuauugacuuuuauagaanguuguacuacuauagauggcaauagcuaccagu  
>3p-matureseq  
auagauggcauagcuaccagu  
>5p-matureseq  
uguagcuauugacuuuuauaga  
~~~~~  
>gis-dre-mir-334  
uguaucuccaucuagaccucacugugcugcaggagagggguugggucuagauuggauacagc  
>5p-matureseq  
uguaucuccaucuagaccucacu  
>3p-matureseq  
uugggucuagauuggauacagc  
~~~~~  
>gis-dre-mir-335  
uguaucuccaucuggacuucuuugcccuguagaagauggugaagucuagaugggauacagc  
>3p-matureseq  
ugaagucuagaugggauacagc  
>5p-matureseq  
uguaucuccaucuggacuucuu  
~~~~~  
>gis-dre-mir-336  
ugucacacuuuucaggucagcuuacaagcuguugaucugaauuaggcguguuugg  
>3p-matureseq  
ugaucugaauuaggcguguuugg  
>5p-matureseq  
ugucacacuuuucaggucagc  
~~~~~  
>gis-dre-mir-337



ugugaacacaugggaaaacguguguauuuggaacgcuuucuugugaauucacaugu  
>3p-matureseq  
gcuuucuugugaauucacaugu  
>5p-matureseq  
ugugaacacaugggaaaacgugu  
~~~~~  
>gis-dre-mir-338  
ugugaggucuuggguugguacuauauaagagucaaaucuagguuuucguagucuguauauucguagc  
uucaguacc  
>3p-matureseq  
guauauucguagcuucaguacc  
>5p-matureseq  
ugugaggucuuggguugguacu  
~~~~~  
>gis-dre-mir-339  
uguggugauuagaacaggcugacuuuugcaagugugaugcggccuacuaacaccacaca  
>3p-matureseq  
ugcggccuacuaacaccacaca  
>5p-matureseq  
uguggugauuagaacaggcugacu  
~~~~~  
>gis-dre-mir-340  
ugugugagugcagcagugcaguagacggcagugcaugaacagcuuucuguguucugcgcuacgcacuc  
gccacu  
>3p-matureseq  
ucugcgcuacgcacucgccacu  
>5p-matureseq  
ugugugagugcagcagugcaguag  
~~~~~  
>gis-dre-mir-341  
uguuauacacagacccggauuggccaauucgggaggaccgggagaguucccgguugggcccagucuguuuu  
uuggccgag  
>3p-matureseq  
ccagucuguuuuuuggccgag  
>5p-matureseq  
uguuauacacagacccggauuggcc  
~~~~~  
>gis-dre-mir-342  
uuacuuggaaggucacauccaugaguaguuaagaauuggguugaugaugugccucuccgaguaaa  
>3p-matureseq  
ugaugugccucuccgaguaaa  
>5p-matureseq  
uuacuuggaaggucacaucc  
~~~~~  
>gis-dre-mir-343  
uuagacugaaaucuguuggagccaacauuuuccccagccgaacugcggcucuucagcacgacgggagc  
uaguu  
>3p-matureseq  
cuucagcacgacgggagcuaguu  
>5p-matureseq  
uuagacugaaaucuguuggagcc  
~~~~~  
>gis-dre-mir-344  
uuagacugaaaucuguuggagccaacauuuuccccagccgagcugcggcucuucagcacgacgggagc

uaguu  
>3p-matureseq  
cuucagcacgacgggagcuaguu  
>5p-matureseq  
uuagacugaaaucuguuggagcc  
~~~~~  
>gis-dre-mir-345  
uuaggaucggguuuggacacccuugcucuaagccagagguguccaaacucgauccuggag  
>3p-matureseq  
uguccaaacucgauccuggag  
>5p-matureseq  
uuaggaucggguuuggacacc  
~~~~~  
>gis-dre-mir-346  
uuagucacauuugggcaaguucuuugaucuugauuuacuggaacuccuuggauguugacugga  
>3p-matureseq  
aacuccuuggauguugacugga  
>5p-matureseq  
uuagucacauuugggcaaguucu  
~~~~~  
>gis-dre-mir-347  
uuagucacauuugggcgaguucuuuggucaucuuugaauuuuggaacuccuuggauguugacugga  
>3p-matureseq  
aacuccuuggauguugacugga  
>5p-matureseq  
uagucacauuugggcgaguucu  
>5p-matureseq  
uuagucacauuugggcgaguucu  
~~~~~  
>gis-dre-mir-348  
uuagucacauuugggcgaguucuuuggucaucuuugaauuuuggaacuccuuggauguugacugga  
>3p-matureseq  
aacuccuuggauguugacugga  
>5p-matureseq  
uagucacauuugggcgaguucu  
>5p-matureseq  
uuagucacauuugggcgaguucu  
~~~~~  
>gis-dre-mir-349  
uucacuguggcgaaaugaccucgguaacauaaagaguguuauacuugccgcagugaug  
>3p-matureseq  
uuauacuugccgcagugaug  
>5p-matureseq  
uucacuguggcgaaaugaccuc  
~~~~~  
>gis-dre-mir-350  
uucacuguggcgaaaugaccucgguaacaucaagaguguuauacuugccgcagugaug  
>3p-matureseq  
uuauacuugccgcagugaug  
>5p-matureseq  
uucacuguggcgaaaugaccuc  
~~~~~  
>gis-dre-mir-351  
uucaguuugguacgcuuuuauuggcuguuuccacugucaaaaggcauaccaaaccgaacc

>3p-matureseq  
aaaaggcauaccaaaccgaacc  
>5p-matureseq  
uucaguuugguacgcuuuuauugg  
~~~~~  
>gis-dre-mir-352  
uuccaaauguauuuucuauuguauuuuuauacaaagaaauacauuuggaca  
>3p-matureseq  
uacaaagaaauacauuuggaca  
>5p-matureseq  
uuccaaauguauuuucuauuguau  
~~~~~  
>gis-dre-mir-353  
uucgguaaugacacggaagcugggauggcaucgucggcugucguauuuuuagcggaag  
>3p-matureseq  
ggcugucguauuuuuagcggaag  
>5p-matureseq  
uucgguaaugacacggaagcug  
~~~~~  
>gis-dre-mir-354  
uucucaguucagcgugucaaauguugauucgaaaugauuuggacucacugaaccgagaau  
>5p-matureseq  
uucucaguucagcgugucaaa  
>3p-matureseq  
uuggacucacugaaccgagaau  
~~~~~  
>gis-dre-mir-355  
uucucuugcguccuuggaaguucagacuugcaagaacgaacucccgaggacgugaggac  
>3p-matureseq  
acucccgaggacgugaggac  
>5p-matureseq  
uucucuugcguccuuggaaguuc  
~~~~~  
>gis-dre-mir-356  
uugacagcaguccuccagucaugcugcucgagcuaucugcagcgcuggagcugcuucagcc  
>3p-matureseq  
gcgcuggagcugcuucagcc  
>5p-matureseq  
uugacagcaguccuccagucaug  
~~~~~  
>gis-dre-mir-357  
uugaccagccuggacauagcuggucuuuggcugggcucccagccagaccagcuaagaccaggcuggaau  
uggc  
>3p-matureseq  
agcuaagaccaggcuggaauuggc  
>5p-matureseq  
uugaccagccuggacauagcugg  
~~~~~  
>gis-dre-mir-358  
uugaccagccuggacauagcugguuuggcuggacucccagcuuggcuaggcuggucaagc  
>3p-matureseq  
agcuuggcuaggcuggucaagc  
>5p-matureseq  
uugaccagccuggacauagcugg

```
~~~~~  
>gis-dre-mir-359  
uugaccagccuggacauagcugguuuuggcugggcuuccagcuuggguaggcuggucaagc  
>3p-matureseq  
agcuuggguaggcuggucaagc  
>5p-matureseq  
uugaccagccuggacauagcugg  
~~~~~  
>gis-dre-mir-360  
uugagaaucaucugcaaucauucagcuuaauuucugggugacuuuaacuggauguuuguguguuuc  
ucagag  
>3p-matureseq  
uguuuguguguuucucagag  
>5p-matureseq  
uugagaaucaucugcaaucau  
~~~~~  
>gis-dre-mir-361  
uugauuugguacacuuuuguggccguuuccacugucaaaaggcguaccgaaccaaac  
>3p-matureseq  
caaaggcguaccgaaccaaac  
>5p-matureseq  
uugauuugguacacuuuugug  
~~~~~  
>gis-dre-mir-362  
uugcuuuauaguuaaacacucgcugguuauaauagagcuuguuaaacucuaaagcaca  
>3p-matureseq  
cuuguuaaacucuaaagcaca  
>5p-matureseq  
uugcuuuauaguuaaacacucgcu  
~~~~~  
>gis-dre-mir-363  
uuggagaaaggauuuccugaacaaaggaagauguguuuuguugaggauccucucucgca  
>3p-matureseq  
ugaggauccucucucgca  
>5p-matureseq  
uuggagaaaggauuuccugaac  
~~~~~  
>gis-dre-mir-364  
uuggcuaaucgggcagacugggagaauucccguggggccggucugucuuuuggccgca  
>3p-matureseq  
cggucugucuuuuggccgca  
>5p-matureseq  
uuggcuaaucgggcagacuggg  
~~~~~  
>gis-dre-mir-365  
uugggggggaaauacacaggugggcugauaauuauagacuuaacucuguguuuuucucuccaaca  
>3p-matureseq  
acucuguguuuuucucuccaaca  
>5p-matureseq  
uugggggggaaauacacagguggg  
~~~~~  
>gis-dre-mir-366  
uuggguaccguucagguuuuuacugguauuguacuuguaaugcggcacugguauccaucu  
>3p-matureseq
```

aaugcggcacugguauccaucu  
>5p-matureseq  
uuggguaccguucagguuuuuu  
~~~~~  
>gis-dre-mir-367  
uuguggugauuagaacaggcugacuucugcaagucugaugcggccuacuaacaccacacacaugc  
>3p-matureseq  
gccuacuaacaccacacacaugc  
>3p-matureseq  
ugcggccuacuaacaccacaca  
>5p-matureseq  
uguggugauuagaacaggcugacu  
>5p-matureseq  
uuguggugauuagaacaggcuga  
~~~~~  
>gis-dre-mir-368  
uuuagaggagagaugauggagcgcuguguguugaaugcucuguaauucucuccucugaggac  
>3p-matureseq  
ucuguaauucucuccucugaggac  
>5p-matureseq  
uuuagaggagagaugauggagcg  
~~~~~  
>gis-dre-mir-369  
uuuccaccccucugucccauagcagaugugugucugggacaggcaggggcagaau  
>3p-matureseq  
ucugggacaggcaggggcagaau  
>5p-matureseq  
uuuccaccccucugucccauag  
~~~~~  
>gis-dre-mir-370  
uuugccaugauaugcagauauguguuuuaaacacuuuuuauaucuguaaucauggcaaaaau  
>3p-matureseq  
uauaucuguaaucauggcaaaaau  
>5p-matureseq  
uuugccaugauaugcagauaug  
~~~~~  
>gis-dre-mir-371  
uuugggagcagagauugaaacagcccauuaaaaaaguuguuuuuuuuuuuugccccacaac  
>5p-matureseq  
uuugggagcagagauugaaac  
>3p-matureseq  
uuuuuuuuuuugccccacaac  
~~~~~  
>gis-dre-mir-372  
uuuggggagacagaaaucguguccuuuccaugauuuguguaaaaauugugucuccucagc  
>3p-matureseq  
gauaaaauugugucuccucagc  
>5p-matureseq  
uuuggggagacagaaaucguguc  
~~~~~  
>gis-dre-mir-373  
uuugguucgguacgccuuuugacaguggaaacggccauaaaagcguaccaaacagaacc  
>3p-matureseq  
aaaagcguaccaaacagaacc

>5p-matureseq  
uuugguucgguacgccuuuuga  
~~~~~  
>gis-dre-mir-374  
uuugguucgguacgccuuuugacaguggaaacggccaauaaaagcguaccaaaccgaacc  
>3p-matureseq  
aaaagcguaccaaaccgaacc  
>3p-matureseq  
auaaaagcguaccaaaccgaacc  
>3p-matureseq  
uaaaagcguaccaaaccgaacc  
>5p-matureseq  
uuugguucgguacgccuuuuga  
~~~~~  
>gis-dre-mir-375  
uuugguucgguacgcuuauugacaguggaaauggacauaaaagcguaccaaaccgaacc  
>3p-matureseq  
aaaagcguaccaaaccgaacc  
>3p-matureseq  
auaaaagcguaccaaaccgaacc  
>3p-matureseq  
uaaaagcguaccaaaccgaacc  
>5p-matureseq  
uuugguucgguacgcuuauuga  
~~~~~  
>gis-dre-mir-376  
uuugguucgguucgcuuuugacaguggaaacggccaauaaaagcguaccaaaccgaacc  
>3p-matureseq  
aaaagcguaccaaaccgaacc  
>3p-matureseq  
auaaaagcguaccaaaccgaacc  
>3p-matureseq  
uaaaagcguaccaaaccgaacc  
>5p-matureseq  
uuugguucgguucgcuuuugac  
~~~~~  
>gis-dre-mir-377  
uuuucggucagugacuggugccaguaauugagcuggcuuucucucacguccugagacccccgc  
>3p-matureseq  
gcuuucucucacguccugagacccccgc  
>5p-matureseq  
uuuucggucagugacuggugcc  
~~~~~  
>gis-dre-mir-378  
uuuuuaccucugacaccacauggaaucaauugaacaguugcaauuuucucagguugucucaagggg  
caaaagg  
>3p-matureseq  
caggugucucaaggggcaaaagg  
>5p-matureseq  
uuuuuaccucugacaccaca  
~~~~~  
>gis-dre-mir-379  
aaagauccuaauuauugccacacaucgucguuuguugcauauuuagggucucgcu  
>5p-matureseq

aaagauccuaauuaugccac  
>5p-matureseq  
aaagauccuaauuaugccaca  
>3p-matureseq  
ugcauaauuagggucucgcu  
>3p-matureseq  
uugcauaauuagggucucgcu  
~~~~~  
>gis-dre-mir-380  
aaaguaacaagugucaagugacuggacaccaucgucacuugacacuuguuacuuuuc  
>5p-matureseq  
aaaguaacaagugucaagugac  
>5p-matureseq  
aaguaacaagugucaagugacu  
>3p-matureseq  
cacuugacacuuguuacuuuuc  
>3p-matureseq  
ucacuugacacuuguuacuuuu  
~~~~~  
>gis-dre-mir-381  
aacacggcuagugacuggucaagguuuacuuucuccagucagugguuguguggu  
>5p-matureseq  
aacacggcuagugacugguca  
>5p-matureseq  
aacacggcuagugacuggucaag  
>3p-matureseq  
cuccagucagugguuguguggu  
>3p-matureseq  
uccagucagugguuguguggu  
~~~~~  
>gis-dre-mir-382  
aacagcccugaaaucagacagcugugcagugacucaugucugaauacacggacugcucc  
>5p-matureseq  
aacagcccugaaaucagaca  
>5p-matureseq  
acagcccugaaaucagaca  
>3p-matureseq  
ucugaauacacggacugcuc  
>3p-matureseq  
ucugaauacacggacugcucc  
~~~~~  
>gis-dre-mir-383  
aauggaaaucucgcugauacugcaagaauuguggcaucgguaaagccaguuuuccgaua  
>5p-matureseq  
aauggaaaucucgcugauacu  
>3p-matureseq  
guauaagccaguuuuccgaua  
>3p-matureseq  
uauaagccaguuuuccgaua  
~~~~~  
>gis-dre-mir-384  
acacgauacaanguucuagaaugcugggauggccauucuagaacauuuugucgugucu  
>5p-matureseq  
acacgauacaanguucuagaug

>5p-matureseq  
acacgauacauguucuagaugcug  
>5p-matureseq  
cacgauacauguucuagaug  
>3p-matureseq  
uucuagaacauuuugucguguc  
>3p-matureseq  
uucuagaacauuuugucgugucu  
~~~~~  
>gis-dre-mir-385  
acaggaauuuggccacugcacucuucagauaaguuggucgugggccaaauuccuguaa  
>5p-matureseq  
acaggaauuuggccacugca  
>5p-matureseq  
acaggaauuuggccacugcacu  
>3p-matureseq  
ugcuguggccaaauuccuguaa  
~~~~~  
>gis-dre-mir-386  
acugaguuuggacaccauuguucuauaaaauaugauauuguuguccaaacucggucc  
>5p-matureseq  
acugaguuuggacaccauuguu  
>5p-matureseq  
cugaguuuggacaccauuguu  
>3p-matureseq  
uauuguuguccaaacucgguc  
>3p-matureseq  
uauuguuguccaaacucggucc  
~~~~~  
>gis-dre-mir-387  
agacaacuugcuggagagcuuuuuuuucugugauuuuucaugaacucuaaaaagcucuccagcgaau  
ugccua  
>5p-matureseq  
agacaacuugcuggagagcuu  
>5p-matureseq  
agacaacuugcuggagagcuuu  
>3p-matureseq  
agcucuccagcgaauugccua  
~~~~~  
>gis-dre-mir-388  
agagagaaaagucuguggcuuggguggcuggagucacugauaaucucuuggc  
>5p-matureseq  
agagagaaaagucuguggcuug  
>3p-matureseq  
agucacugauaaucucuuggc  
~~~~~  
>gis-dre-mir-389  
agagagaaaugucuauggcuuggguggcuggagucuaugauaaucucuuggc  
>5p-matureseq  
agagagaaaugucuauggcuug  
>3p-matureseq  
agucacugauaaucucuuggc  
>3p-matureseq  
gucauugauaaucucuuggc



```
~~~~~  
>gis-dre-mir-390  
agccauugacuuucuaguaugaaaaacaacuacuaagcaagucaguggucac  
>5p-matureseq  
agccauugacuuucuaguaug  
>3p-matureseq  
uacuaagcaagucaguggucac  
~~~~~  
>gis-dre-mir-391  
agcugguuaacccacaccagcagaaccaccgcuucaugcuagugugggucaaccggcgcu  
>5p-matureseq  
agcugguuaacccacaccagca  
>3p-matureseq  
cuagugugggucaaccggcg  
>3p-matureseq  
cuagugugggucaaccggcgcu  
>5p-matureseq  
gcugguuaacccacaccagca  
~~~~~  
>gis-dre-mir-392  
aggagguggagucgggacacggccaggcuuguuaggaaugucaucccgaaagcaccuccucc  
>5p-matureseq  
aggagguggagucgggacacggcc  
>5p-matureseq  
ggagguggagucgggacacggcc  
>5p-matureseq  
ggagguggagucgggacacggcca  
>3p-matureseq  
ucaucccgaaagcaccuccuc  
>3p-matureseq  
ucaucccgaaagcaccuccucc  
~~~~~  
>gis-dre-mir-393  
agggccaugacggaaaucagccuguguucuuuaagguucucucugguccugucuuggcuuac  
>5p-matureseq  
agggccaugacggaaaucagcc  
>5p-matureseq  
agggccaugacggaaaucagccu  
>3p-matureseq  
ucugguccugucuuggcuuac  
~~~~~  
>gis-dre-mir-394  
aguaccugcgaaugcuuggccaugaguguuucugcugcacuaggacuacucaugucguggacugu  
agaagccu  
>5p-matureseq  
aguaccugcgaaugcuuggccaugagugu  
>5p-matureseq  
guaccugcgaaugcuuggccaugaguguuu  
>3p-matureseq  
ucaugucguggacuguagaagccu  
~~~~~  
>gis-dre-mir-395  
aguacgguucacuuuuagauaccuuuuagacaguggaaacggccuaaaagcguaccguaacg  
>5p-matureseq
```

aguacgguucacuuuuagauac  
>3p-matureseq  
gcccuaaaagcguaccguaacg  
>5p-matureseq  
guacgguucacuuuuagauacc  
~~~~~  
>gis-dre-mir-396  
agugcaaaguuuuacaugcgcgcugugugugucagcugugugcgcaugcgugaacuuuguacc  
>5p-matureseq  
agugcaaaguuuuacaugcgc  
>5p-matureseq  
agugcaaaguuuuacaugcgcg  
>5p-matureseq  
agugcaaaguuuuacaugcgcgc  
>5p-matureseq  
ugcaaaguuuuacaugcgcgc  
>5p-matureseq  
ugcaaaguuuuacaugcgcgcu  
>5p-matureseq  
ugcaaaguuuuacaugcgcgcg  
>3p-matureseq  
ugcgcaugcgugaacuuuguacc  
~~~~~  
>gis-dre-mir-397  
aguucacuuggauuggcugaucuauuuugcagugaucggccgaccagugugcugug  
>5p-matureseq  
aguucacuuggauuggcugauc  
>3p-matureseq  
ucggccgaccagugugcugu  
>3p-matureseq  
ucggccgaccagugugcugug  
~~~~~  
>gis-dre-mir-398  
auaaccaucgauguccauagguuuuuuuuuccaucuugcaugcaugcaaugguuauaucagu  
>5p-matureseq  
auaaccaucgauguccauagg  
>5p-matureseq  
auaaccaucgauguccauaggu  
>3p-matureseq  
augcaugcaaugguuauaucagu  
>3p-matureseq  
uaucaugcaaugguuauaucagu  
~~~~~  
>gis-dre-mir-399  
auaucagcacugguggaggugugcguugcucuagucuccuaccagugcugauauac  
>5p-matureseq  
auaucagcacugguggaggugu  
>5p-matureseq  
uaucaugcacugguggaggugug  
>3p-matureseq  
ucuccuaccagugcugauauac  
~~~~~  
>gis-dre-mir-400  
auguauaucgacacuggugaguggagugccuuauuguccaccagugaugauauacagc

>5p-matureseq  
auguauaucgacacuggugagu  
>3p-matureseq  
cccaccagugaugauauacagc  
>3p-matureseq  
ucccaccagugaugauauacagc  
~~~~~  
>gis-dre-mir-401  
augucagaugugagaugagcgugaucagauuauaccgcagcacauccacucaucugucaug  
>3p-matureseq  
acaucuccacucaucugucaug  
>5p-matureseq  
augucagaugugagaugagcg  
>3p-matureseq  
cacaucuccacucaucugucaug  
>5p-matureseq  
ugucagaugugagaugagcg  
~~~~~  
>gis-dre-mir-402  
auguuuccagcuugcugauuuugcauuucugcucaaaucuaagugaacugagaaaaacagg  
>5p-matureseq  
auguuuccagcuugcugauu  
>5p-matureseq  
auguuuccagcuugcugauuu  
>3p-matureseq  
uaagugaacugagaaaaacagg  
~~~~~  
>gis-dre-mir-403  
ccaaacuugugaccccaugacuuccgcuagacugucaugcggacauaaaguugggc  
>5p-matureseq  
ccaaacuugugaccccaugac  
>3p-matureseq  
ucaugcggacauaaaguugggc  
~~~~~  
>gis-dre-mir-404  
ccgcggacggugugaggccggugucggccccgccccgcccggggg  
>5p-matureseq  
ccgcggacggugugaggccgg  
>5p-matureseq  
ggacggugugaggccgg  
>3p-matureseq  
ggccccgccccgcccgggg  
~~~~~  
>gis-dre-mir-405  
ccuagagugucaacugcuguucaaaacuagacuaguuuacaacaugucacucuaggcu  
>3p-matureseq  
aacaacaugucacucuaggcu  
>5p-matureseq  
ccuagagugucaacugcuguuca  
~~~~~  
>gis-dre-mir-406  
ccuguagccacugacuucuauaguauguguuuuuccuacuauagagaucaauggcuacaagu  
>5p-matureseq  
ccuguagccacugacuucuau

>5p-matureseq  
cuguagccacugacuuuauagu  
>3p-matureseq  
uauagagaucaauggcuacaagu  
~~~~~  
>gis-dre-mir-407  
cgaguagcagugcgauguggcugugauuauauacagcuacauugcacuucacgagu  
>5p-matureseq  
cgaguagcagugcgauguggcugu  
>3p-matureseq  
cuacauugcacuucacgagu  
>5p-matureseq  
gaguagcagugcgauguggcug  
~~~~~  
>gis-dre-mir-408  
cggcacuuuggggcgaaggcucgccggcacuuuggggcgaaggcucgccggcgugcuugagaacgag  
ggcucgccggc  
>5p-matureseq  
cggcacuuuggggcgaaggcucg  
>5p-matureseq  
ggcacuuuggggcgaaggcucg  
>3p-matureseq  
ugcuugagaacgaggcucgccgg  
>3p-matureseq  
ugcuugagaacgaggcucgccggc  
~~~~~  
>gis-dre-mir-409  
cgguuugguaggcuuuuauaggcuguuuccacugucaaaagguguaccggaccgua  
>5p-matureseq  
cgguuugguaggcuuuuauaggcu  
>3p-matureseq  
ucaaagguguaccggaccgua  
~~~~~  
>gis-dre-mir-410  
cguguaauuguuugugguuuauacgguguaggugaccuauagaaccacagacgauuaccgcu  
>5p-matureseq  
cguguaauuguuugugguuuaua  
>3p-matureseq  
ugaaccacagacgauuaccgcu  
~~~~~  
>gis-dre-mir-411  
cuagucacauucaggcgaguucuuugauuuuuugaauucaugguacuccuuggauguugacugga  
>3p-matureseq  
augguacuccuuggauguugac  
>5p-matureseq  
cacauucaggcgaguucuuuga  
>5p-matureseq  
cuagucacauucaggcgagu  
>3p-matureseq  
uacuccuuggauguugacugga  
>5p-matureseq  
uagucacauucaggcgaguucu  
~~~~~  
>gis-dre-mir-412

cuagucacauuugggcgaguucuuguucaucuugaauucaugguacuccuuggauguugacugga  
>3p-matureseq  
augguacuccuuggauguugac  
>5p-matureseq  
cuagucacauuugggcgaguucu  
>3p-matureseq  
uacuccuuggauguugacugga  
>5p-matureseq  
uagucacauuugggcgaguucu  
~~~~~  
>gis-dre-mir-413  
cuccaaccuugaucaagcagcucaauaauuuacagacggcugauugaacagggauuggaag  
>5p-matureseq  
cuccaaccuugaucaagcagcu  
>3p-matureseq  
cugauugaacagggauuggaag  
~~~~~  
>gis-dre-mir-414  
cucgcucuccuucgacuuguugugacgcagacauaaaacagggagauggagagggagg  
>3p-matureseq  
cacagggagauggagagggagg  
>5p-matureseq  
cucgcucuccuucgacuuguu  
>5p-matureseq  
cucgcucuccuucgacuuguu  
~~~~~  
>gis-dre-mir-415  
cugguggucggguaccugcaggguuuagcuaaaaucugcaggacaccggaccuccagga  
>3p-matureseq  
aggacaccggaccuccagga  
>5p-matureseq  
cugguggucggguaccugc  
>3p-matureseq  
ugcaggacaccggaccuccagg  
>5p-matureseq  
ugguggucggguaccugcagg  
~~~~~  
>gis-dre-mir-416  
cuuacaauuaaaggauuuucuugcggcugaauacgagaacagaaauguccuuaauuguuuggu  
>3p-matureseq  
aaauguccuuaauuguuuggu  
>3p-matureseq  
agaaauguccuuaauuguuug  
>5p-matureseq  
cuuacaauuaaaggauuuucu  
>5p-matureseq  
uuacaauuaaaggauuuucu  
~~~~~  
>gis-dre-mir-417  
gacuuggucuaagcuccucagugugaugauuaaaccugaggaguuuagagcaaguaa  
>5p-matureseq  
gacuuggucuaagcuccucagu  
>3p-matureseq  
ugaggaguuuagagcaaguaa

~~~~~  
>gis-dre-mir-418  
gagcaguccguguauucagacaugaagucacugcacagcugucugaauuucagggcuguuccc  
>5p-matureseq  
gagcaguccguguauucagaca  
>3p-matureseq  
ucugaauuucagggcuguuccc  
~~~~~  
>gis-dre-mir-419  
gaggucacgagugggucaggguuaccacaaacuaaccgaauccaucagucacgugaccuac  
>5p-matureseq  
gaggucacgagugggucag  
>3p-matureseq  
uccaucagucacgugaccuac  
~~~~~  
>gis-dre-mir-420  
gauggaugggacgacaaagccaaaaaacauacuucuuugcuuuuauucgccuuguuccauucc  
>5p-matureseq  
gauggaugggacgacaaagc  
>5p-matureseq  
gauggaugggacgacaaagcc  
>5p-matureseq  
gauggaugggacgacaaagcca  
>3p-matureseq  
uuuuauucgccuuguuccauucc  
~~~~~  
>gis-dre-mir-421  
gauuccuauauacaguuugcuuaaauguuacauucaagcuguauauaugaacauc  
>5p-matureseq  
gauuccuauauacaguuugcuu  
>3p-matureseq  
ucaagcuguauauaugaacauc  
~~~~~  
>gis-dre-mir-422  
gccgguguucugcugaguuuagcuaggguggaccuagacucuccaguacacuggcccu  
>3p-matureseq  
agacucuccaguacacuggcccu  
>5p-matureseq  
gccgguguucugcugaguuuagcuagg  
>5p-matureseq  
gguguucugcugaguuuagcu  
~~~~~  
>gis-dre-mir-423  
gcggcguggaguuuccuguugaauuguccugucgagcgcaacaggaacuuccagcccgagc  
>3p-matureseq  
acaggaacuuccagcccgagc  
>3p-matureseq  
caacaggaacuuccagcccga  
>5p-matureseq  
gcggcguggaguuuccuguug  
>5p-matureseq  
ggcguggaguuuccuguugaa  
~~~~~  
>gis-dre-mir-424

gcuggacauuugcgcaagcaauuuuauucucuaaaaauugcaugcauaaauguccggu  
>3p-matureseq  
auugcaugcauaaauguccggu  
>5p-matureseq  
gcuggacauuugcgcaagcaau  
>3p-matureseq  
uugcaugcauaaauguccggu  
~~~~~  
>gis-dre-mir-425  
gcuguggcucuucagcagggccaugagaaugugguggcccugcucaucaaccacgguacu  
>3p-matureseq  
ccugcucaucaaccacgguacu  
>5p-matureseq  
gcuguggcucuucagcagggc  
~~~~~  
>gis-dre-mir-426  
ggccaguugccugacauggacgagaugccuacggguuguucguggcacgcuauccuggca  
>5p-matureseq  
ggccaguugccugacauggac  
>5p-matureseq  
ggccaguugccugacauggacg  
>5p-matureseq  
ggccaguugccugacauggacga  
>3p-matureseq  
guucguggcacgcuauccuggca  
~~~~~  
>gis-dre-mir-427  
ggcucaaagauggagagagugcaguucauucacuccuccgucauugaauuccu  
>3p-matureseq  
uccuccgucauugaauuccu  
>5p-matureseq  
ggcucaaagauggagagagug  
>5p-matureseq  
ggcucaaagauggagagagugc  
>3p-matureseq  
uccuccgucauugaauuccu  
~~~~~  
>gis-dre-mir-428  
gguguuguguguuaaacuguaauuccuaaacaacaucauaguuuugauucacagcacaag  
>5p-matureseq  
gguguuguguguuaaacugua  
>3p-matureseq  
uaguuuugauucacagcacaag  
~~~~~  
>gis-dre-mir-429  
gguuugguucgguaugccuuuugacaguggaaacggcuauaaaggcguaccuaaccgaacugu  
>3p-matureseq  
aggcguaccuaaccgaacugu  
>5p-matureseq  
gguuugguucgguaugccuuu  
>5p-matureseq  
uugguucgguaugccuuuuga  
>5p-matureseq  
uugguucgguaugccuuuugac

~~~~~  
>gis-dre-mir-430  
guagccauugacuucuaauaguguuuuuuuccgacuacaugagucaaugguuaccg  
>5p-matureseq  
guagccauugacuucuaauaguguuug  
>3p-matureseq  
uacaugagucaaugguuaccg  
~~~~~  
>gis-dre-mir-431  
guagccugaacaaaaccugauuguauucuauguucuaaucaagcuuuguucaagcuag  
>5p-matureseq  
guagccugaacaaaaccugauu  
>5p-matureseq  
uagccugaacaaaaccugauug  
>3p-matureseq  
uucaagcuuuguucaagcuag  
~~~~~  
>gis-dre-mir-432  
guaucCCAUCUAGACUUCACUUCACUGCAGGAGAGGGUGAGGUCUAGAUGGGAUACAGC  
>5p-matureseq  
guaucCCAUCUAGACUUCACU  
>3p-matureseq  
UGAGGUCUAGAUGGGAUACAGC  
~~~~~  
>gis-dre-mir-433  
guaucCUAUCUGGACUUCACAGUCUCCUGCAGCAUGGUGAACGCUAGAUGGGAUACAG  
>5p-matureseq  
guaucCUAUCUGGACUUCACA  
>3p-matureseq  
UGAACGCUAGAUGGGAUACAG  
~~~~~  
>gis-dre-mir-434  
GUGAGGAUCAUCGUGAGGUCAGUGUGUGUUUAAUAAUGAGCGUCUCUUUUAAAAGCACUGACUUUUCU  
CUGGUCUGCACA  
>5p-matureseq  
GUGAGGAUCAUCGUGAGGUCAGU  
>3p-matureseq  
UGACUUUUCUCUGGUCUGCACA  
>5p-matureseq  
UGAGGAUCAUCGUGAGGUCAGU  
~~~~~  
>gis-dre-mir-435  
GUUCGGUUCGGUACGCUUUUAUGGCCGUUCCACUGUCAAAAAGUGUACCGAACCAAACCG  
>3p-matureseq  
CAAAAAGUGUACCGAACCAAAC  
>3p-matureseq  
CAAAAAGUGUACCGAACCAAACC  
>3p-matureseq  
CAAAAAGUGUACCGAACCAAACCG  
>5p-matureseq  
GUUCGGUUCGGUACGCUUUUAUGGC  
>3p-matureseq  
UCAAAAAGUGUACCGAACCAAAC  
>5p-matureseq



ucgguucgguacgcuuuuauaggc  
>5p-matureseq  
uucgguucgguacgcuuuuauaggc  
>5p-matureseq  
uucgguucgguacgcuuuuauaggc  
~~~~~  
>gis-dre-mir-436  
guucgguuugguacgcuuuuauaggaccuuuccauugucaaaaguguaccgaaccaaaccg  
>3p-matureseq  
caaaaguguaccgaaccaaacc  
>3p-matureseq  
caaaaguguaccgaaccaaacc  
>3p-matureseq  
caaaaguguaccgaaccaaaccg  
>5p-matureseq  
guucgguuugguacgcuuuuauaggc  
>3p-matureseq  
ucaaaaaguguaccgaaccaaacc  
>5p-matureseq  
ucgguuugguacgcuuuuauaggc  
>5p-matureseq  
uucgguuugguacgcuuuuauaggc  
>5p-matureseq  
uucgguuugguacgcuuuuauaggc  
~~~~~  
>gis-dre-mir-437  
guucgguuugguacgcuuuuauaggccguuuccacugucaaaaguguaccgaaccaaaccg  
>3p-matureseq  
caaaaguguaccgaaccaaacc  
>3p-matureseq  
caaaaguguaccgaaccaaacc  
>3p-matureseq  
caaaaguguaccgaaccaaaccg  
>5p-matureseq  
gguuugguacgcuuuuauaggcc  
>5p-matureseq  
guucgguuugguacgcuuuuauaggc  
>3p-matureseq  
ucaaaaaguguaccgaaccaaacc  
>5p-matureseq  
ucgguuugguacgcuuuuauaggc  
>5p-matureseq  
uucgguuugguacgcuuuuauaggc  
~~~~~  
>gis-dre-mir-438  
guugaaaaucaaagguggcuaguugggcagcccaucucuguucuaaggcaccuaguuuagc  
>5p-matureseq  
guugaaaaucaaagguggcuaguugggca  
>3p-matureseq  
ucuguucuaaggcaccuaguuuagc  
>5p-matureseq  
ugaaaaucaaagguggcuaguugggcagccc  
~~~~~  
>gis-dre-mir-439

guugggggcaaucaguggagcucaugcugcugcuccacugcucugccuccccu  
>3p-matureseq  
cuccacugcucugccuccccu  
>5p-matureseq  
guugggggcaaucaguggagcu  
>5p-matureseq  
ugggggcaaucaguggagcu  
~~~~~  
>gis-dre-mir-440  
uaaacaaguuagcacagacuugaugucagcaaagucugugcuaaacuuguuuaga  
>5p-matureseq  
uaaacaaguuagcacagacu  
>3p-matureseq  
ucugugcuaaacuuguuuaga  
~~~~~  
>gis-dre-mir-441  
uaaacaaguuagcacagacuugcugacaucaaagucugugcuaaacuuguuuaga  
>5p-matureseq  
uaaacaaguuagcacagacu  
>3p-matureseq  
ucugugcuaaacuuguuuaga  
~~~~~  
>gis-dre-mir-442  
uaacguuucgagcccacugacugucuuaaaagagccguggacuugaaacguug  
>3p-matureseq  
gagccguggacuugaaacguug  
>5p-matureseq  
uaacguuucgagcccacugacu  
>5p-matureseq  
uaacguuucgagcccacugacug  
~~~~~  
>gis-dre-mir-443  
uaccgacucacggucucucuccucgcucacaagcgccauuuuggagacagagagcugcgagucggcu  
>3p-matureseq  
agacagagagcugcgagucggcu  
>5p-matureseq  
uaccgacucacggucucucucc  
~~~~~  
>gis-dre-mir-444  
uacuugcucuaaacuccucagguuuaucaucacacugaggagcuuagaccaagucaa  
>5p-matureseq  
uacuugcucuaaacuccucagg  
>3p-matureseq  
ugaggagcuuagaccaaguca  
>3p-matureseq  
ugaggagcuuagaccaagucaa  
~~~~~  
>gis-dre-mir-445  
uagucacauucaggugaguucuuugauuaucaugaaucaugguacuccuuggauguugacugga  
>3p-matureseq  
augguacuccuuggauguugac  
>5p-matureseq  
cacauucaggugaguucuuuga  
>3p-matureseq

uacuccuuggauguugacugga  
>5p-matureseq  
uagucacauucaggugaguucu  
>5p-matureseq  
ucacauucaggugaguucuuug  
>5p-matureseq  
ucacauucaggugaguucuuuga  
~~~~~  
>gis-dre-mir-446  
ucauagcagugcgauuguggcuguaaaauacauccacgucacacugcuacgag  
>3p-matureseq  
auccacgucacacugcuacgag  
>5p-matureseq  
ucauagcagugcgauuguggcu  
>5p-matureseq  
ucauagcagugcgauuguggcug  
>5p-matureseq  
ucauagcagugcgauuguggcugua  
>3p-matureseq  
uccacgucacacugcuacgag  
~~~~~  
>gis-dre-mir-447  
ucaucccucugcucuaucucccucaaaggaccuccaaagggauuagggaauagggaug  
>3p-matureseq  
agggauuagggaauagggaug  
>5p-matureseq  
ucaucccucugcucuaucucccu  
~~~~~  
>gis-dre-mir-448  
ucugaaagcauagugccauggaccuuucuggagaccuugaauuauguaaccggagu  
>3p-matureseq  
accuugaauuauguaaccggagu  
>5p-matureseq  
ucugaaagcauagugccauggacc  
~~~~~  
>gis-dre-mir-449  
ucugcauccaguguacauucagagaacggagacaugguguacgcuggagaacagacu  
>3p-matureseq  
guguacgcuggagaacagacu  
>5p-matureseq  
ucugcauccaguguacauuca  
>5p-matureseq  
ucugcauccaguguacauucag  
~~~~~  
>gis-dre-mir-450  
ucuuggagaauaaauguuggaacggcuugccauauagcgugcucacaauuuuuucucugaca  
>3p-matureseq  
ucacaauuuuuucucugaca  
>5p-matureseq  
ucuuggagaauaaauguuggaac  
~~~~~  
>gis-dre-mir-451  
ugagccacugauguccauaguaggaaacaaaaaaauacuauggaagucuguggcugcuu  
>3p-matureseq

acuauggaagucuguggcugcuu  
>3p-matureseq  
cuauggaagucuguggcugcuu  
>5p-matureseq  
ugagccacugauguccauagu  
~~~~~  
>gis-dre-mir-452  
ugagucuucugguucuugagucguucaucacgugacagaaucggaggacucgag  
>5p-matureseq  
agucuucugguucuugagucguuc  
>5p-matureseq  
gagucuucugguucuugagucguu  
>3p-matureseq  
ugacagaaucggaggacucga  
>3p-matureseq  
ugacagaaucggaggacucgag  
>5p-matureseq  
ugagucuucugguucuugagucguu  
~~~~~  
>gis-dre-mir-453  
uguaccaugcugguagccaguaugaaauagggcuugcugguaaccagcguugugcccc  
>3p-matureseq  
cugguaaccagcguugugccc  
>3p-matureseq  
cugguaaccagcguugugcccc  
>3p-matureseq  
ugguaaccagcguugugcccc  
>5p-matureseq  
uguaccaugcugguagccagu  
>5p-matureseq  
uguaccaugcugguagccagua  
~~~~~  
>gis-dre-mir-454  
uguagaucaguggauuagcagagcugaugugugcuguuacacagauacuacagc  
>3p-matureseq  
ugcuguuacacagauacuacagc  
>5p-matureseq  
uguagaucaguggauuagcaga  
~~~~~  
>gis-dre-mir-455  
uguguguauguaugugcauacuauuuugcaugcaugucugcaccuguauacacacaca  
>3p-matureseq  
ucugcaccuguauacacacaca  
>5p-matureseq  
uguguguauguaugugcauacu  
~~~~~  
>gis-dre-mir-456  
uguugcuauugaccuccauaguguguuuuuuuuuucuaucgauagaagucauuaguucggg  
>3p-matureseq  
gauagaagucauuaguucggg  
>5p-matureseq  
uguugcuauugaccuccauagu  
~~~~~  
>gis-dre-mir-457

uguuugacacuugaagggauuugcuugauuuuugucagcgauucaacuggugucagaguu

>3p-matureseq

cgauucaacuggugucagaguu

>5p-matureseq

uguuugacacuugaagggauuug

>5p-matureseq

uguuugacacuugaagggauuugcu

~~~~~

>gis-dre-mir-458

uugaccauucagacgugacuauauaucaguugaccauucagacgugacuauauaucgguuuga

ugaucuucagac

>3p-matureseq

aucgguuugaugaucuucagac

>5p-matureseq

uugaccauucagacgugacua

>3p-matureseq

uuugaccauucagacguga

~~~~~

>gis-dre-mir-459

uuuauccuaucuagacuuuaccucuccugcagcauggugaagucuagaugggauucagc

>3p-matureseq

ugaagucuagaugggauucagc

>5p-matureseq

uuuauccuaucuagacuuuac

>5p-matureseq

uuuauccuaucuagacuuuacc

~~~~~
